# 1 Dendritic trafficking faces physiologically critical 2 speed-precision tradeoffs

3 Alex H. Williams<sup>1,2,3,\*</sup>, Cian O'Donnell<sup>2,4</sup>, Terrence Sejnowski<sup>2,5</sup>, and Timothy O'Leary<sup>6,7,\*</sup>

4 <sup>1</sup>Department of Neurosciences, University of California, San Diego, La Jolla, CA 92093, USA

5 <sup>2</sup>Howard Hughes Medical Institute, Salk Institute for Biological Studies, La Jolla, CA 92037, USA

6 <sup>3</sup>Department of Neurobiology, Stanford University, Stanford, CA 94305, USA

7 <sup>4</sup>Department of Computer Science, University of Bristol, Woodland Road, Bristol, BS8 1UB, United Kingdom

8 <sup>5</sup>Division of Biological Sciences, University of California at San Diego, La Jolla, CA 92093, USA

9 <sup>6</sup>Volen Center and Biology Department, Brandeis University, Waltham, MA 02454, USA

10 <sup>7</sup>Department of Engineering, University of Cambridge, Trumpington St, Cambridge, CB2 1PZ, United Kingdom

11 \*Address correspondence to: [ahwillia@stanford.edu](mailto:ahwillia@stanford.edu), [timothy.oleary@eng.cam.ac.uk](mailto:timothy.oleary@eng.cam.ac.uk)

## 12 ABSTRACT

13 Nervous system function requires intracellular transport of channels, receptors, mRNAs, and other cargo throughout complex neuronal morphologies. Local signals such as synaptic input can regulate cargo trafficking, motivating the leading conceptual model of neuron-wide transport, sometimes called the “sushi-belt model” (Doyle and Kiebler, 2011). Current theories and experiments are based on this model, yet its predictions are not rigorously understood. We formalized the sushi belt model mathematically, showing how it can achieve arbitrarily complex spatial distributions of cargo in reconstructed morphologies. However, the model also predicts an unavoidable, morphology dependent tradeoff between speed, precision and metabolic efficiency of cargo transport. With experimental estimates of trafficking kinetics, the model predicts delays of many hours or days for modestly accurate and efficient cargo delivery throughout a dendritic tree. These findings challenge current understanding of the efficacy of nucleus-to-synapse trafficking and may explain the prevalence of local biosynthesis in neurons.

14 Keywords: Regulation, Active transport, Plasticity, Tagging hypothesis, Morphology, Motor proteins

## 15 INTRODUCTION

16 Dendritic and axonal trees of neurons often have many tens or even thousands of branches that can extend across the  
17 entire nervous system. Distributing biomolecular cargo within neuronal morphologies is therefore a considerable  
18 logistical task, especially for components that are synthesized in locations distant from their site of use. Nonethe-  
19 less, molecular transport is important for many neurophysiological processes, such as synaptic plasticity, neurite  
20 development and local metabolism. For example, long-lasting forms of synaptic plasticity appear to depend on  
21 anterograde transport of mRNAs (Nguyen et al., 1994; Bading, 2000; Kandel, 2001) and specific mRNAs are known  
22 to be selectively transported to regions of heightened synaptic activity (Steward et al., 1998; Steward and Worley,  
23 2001; Moga et al., 2004) and to developing synaptic contacts (Lyles et al., 2006).

24 On the other hand, local biosynthesis and component recycling are known to support dendritic physiology,  
25 including some forms of synaptic plasticity (Kang and Schuman, 1996; Aakalu et al., 2001; Vickers et al., 2005;

26 Sutton and Schuman, 2006; Holt and Schuman, 2013) and maintenance of cytoskeletal, membrane and signaling  
27 pathways (Park et al., 2004, 2006; Grant and Donaldson, 2009; Zheng et al., 2015). Neurons therefore rely on  
28 a mixture of local metabolism and global transport, but the relative contributions of these mechanisms are not  
29 understood. Analyzing the performance of global trafficking provides a principled way to understand the division of  
30 labor between local and global mechanisms.

31 In this paper we ask a simple question: how well can trafficking perform globally, given what we know about  
32 active transport and the typical morphologies of neurites? There are two parts to this question. First, how can active  
33 transport achieve specific spatial distributions of cargo using only local signals? Second, how long does it take to  
34 distribute cargo to a given degree of accuracy and what factors contribute to delays?

35 Intracellular trafficking mechanisms are being characterized in increasing detail (Buxbaum et al., 2014b;  
36 Hancock, 2014; Wu et al., 2016). Microscopic cargo movements are stochastic, bidirectional, and inhomogeneous  
37 along neurites, leading to the hypothesis that trafficking is predominantly controlled by local pathways that  
38 signal demand for nearby cargo, rather than a centralized addressing system (Welte, 2004; Bressloff and Newby,  
39 2009; Newby and Bressloff, 2010a; Doyle and Kiebler, 2011; Buxbaum et al., 2015). These local signals are  
40 not fully characterized, but there is evidence of multiple underlying mechanisms including transient elevations in  
41 second-messengers like  $[Ca^{2+}]$  and ADP (Mironov, 2007; Wang and Schwarz, 2009), glutamate receptor activation  
42 (Kao et al., 2010; Buxbaum et al., 2014b), and changes in microtubule-associated proteins (Soundararajan and  
43 Bullock, 2014).

44 A leading conceptual model ties together these details by proposing that bidirectional trafficking, combined with  
45 local signalling determines the spatial distribution of cargo in neurons (Welte, 2004; Buxbaum et al., 2015). Doyle  
46 and Kiebler (2011) call this the “sushi belt model”. In this analogy, molecular cargoes are represented by sushi  
47 plates that move along a conveyor belt, as in certain restaurants. Customers sitting alongside the belt correspond to  
48 locations along a dendrite that have specific and potentially time-critical demand for the amount and type of sushi  
49 they consume, but they can only choose from nearby plates as they pass.

50 Stated in words, the sushi belt model is an intuitive, plausible account of the molecular basis of cargo distribution.  
51 Yet it is unclear whether this model conforms to intuition, and whether it implies hidden, biological relevant and  
52 testable predictions. Can this trafficking system accurately generate global distributions of cargo using only local  
53 signals? Does the model predict cross-talk, or interference between spatially separated regions of the neuron that  
54 require the same kind of cargo? How quickly and how accurately can cargo be delivered by this model, given what is  
55 known about trafficking kinetics, and do these measures of performance depend on morphology or the spatial pattern  
56 of demand?

57 We address these questions using simple mathematical models that capture experimentally measured features  
58 of trafficking. We confirm that the sushi-belt model can produce any spatial distribution of cargo in complex  
59 morphologies. However, the model also predicts that global trafficking from the soma is severely limited by tradeoffs  
60 between the speed, efficiency, robustness, and accuracy of cargo delivery. Versions of the model predict testable  
61 interactions between trafficking dependent processes, while the model as a whole suggests that time-critical processes  
62 like synaptic plasticity may be less precise, or less dependent on global transport than is currently assumed.

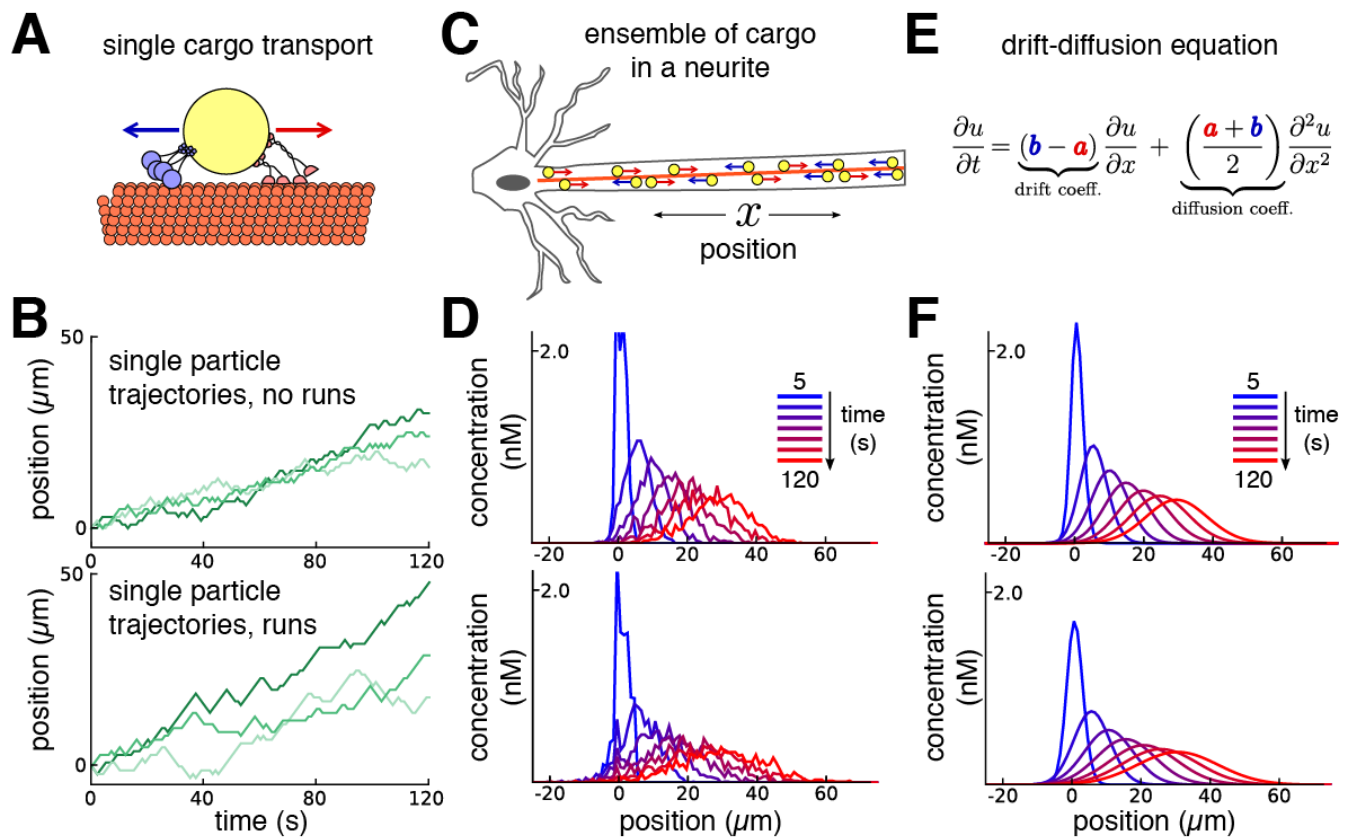

**Figure 1.** Constructing a coarse-grained model of intracellular transport. **(A)** Cartoon of a single cargo particle on a microtubule being subjected to stochastic back-and-forth movements driven by opposing motor proteins. **(B)** Three example biased random walks, representing the movement of individual cargoes. (Top panel) A simple random walk with each step independent of previous steps. (Bottom panel) adding history-dependence to the biased random walk results in sustained unidirectional runs and stalls in movement. **(C)** Cartoon of a population of cargo particles being transported along the length of a neurite. **(D)** Concentration profile of a population cargo transported along a neurite over time, simulated as 1,000 independent random walks. (Top panel) simulations without runs. (Bottom panel) simulations with runs. **(E)** In the limit of many individual cargo particles, the concentration of particles  $u$  is described by a drift diffusion model whose parameters,  $a$  and  $b$ , map onto the mass action model, (equation 1). **(F)** The mass-action model provides a good fit to the simulations of bulk cargo movement in (D). (Top panel) fitted trafficking rates for the model with no runs were  $a \approx 0.42 \text{ s}^{-1}$ ,  $b \approx 0.17 \text{ s}^{-1}$ . (Bottom panel) fitting the model with runs gives  $a \approx 0.79 \text{ s}^{-1}$ ,  $b \approx 0.54 \text{ s}^{-1}$ .

## 63 RESULTS

### 64 A simple model captures bulk behaviour of actively transported cargo

65 Transport along microtubules is mediated by kinesin and dynein motors that mediate anterograde and retrograde  
 66 transport respectively (Block et al., 1990; Hirokawa et al., 2010; Gagnon and Mowry, 2011). Cargo is often  
 67 simultaneously bound to both forms of motor protein, resulting in stochastic back-and-forth movements with a net  
 68 direction determined by the balance of opposing movements (Welte, 2004; Hancock, 2014; Buxbaum et al., 2014a,  
 69 Fig. 1A). We modeled this process as a biased random walk, which is general enough to accommodate variations in  
 70 biophysical details (Bressloff, 2006; Bressloff and Earnshaw, 2007; Müller et al., 2008; Bressloff and Newby, 2009;

71 Newby and Bressloff, 2010a; Bressloff and Newby, 2013).

72 Figure 1 shows this model in a one-dimensional cable, corresponding to a section of neurite. In each unit of  
73 time the cargo moves a unit distance forwards or backwards, or remains in the same place, each with different  
74 probabilities. In the simplest version of the model, the probabilities of forward and backward jumps are constant for  
75 each time step (Fig. 1B, top panel). Cargo can also undergo extended unidirectional runs (Klumpp and Lipowsky,  
76 2005; Müller et al., 2008; Hancock, 2014). The model can account for these runs with jump probabilities that depend  
77 on the previous movement of the particle (Fig. 1B, bottom panel, *Methods*).

78 While the movement of individual cargoes is stochastic, the movement of a population of cargoes (Fig. 1C)  
79 is predictable. This is seen in Figure 1D, which shows the distribution of 1000 molecules over time, with (top  
80 panel) and without (bottom panel) unidirectional runs. The bulk distribution of cargo can therefore be modeled as a  
81 deterministic process that describes how cargo concentration spreads out in time. This leads to the well known  
82 drift-diffusion equation (Fig. 1E) when the movement probabilities are spatially uniform.

83 For simulations and calculations, this process can also be conveniently described by a mass-action model (Voit  
84 et al., 2015) that breaks up the concentration profile along a neurite into small compartments with concentration-  
85 dependent transition rates between adjacent compartments. In a neurite with  $N$  compartments, the mass-action model  
86 is:

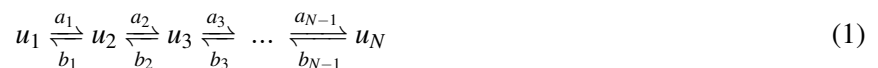

87 where  $u_i$  is the amount of cargo in each compartment, and  $a_i$  and  $b_i$  respectively denote local rate constants for  
88 anterograde and retrograde transport. The parameters of the mass-action model map onto the drift-diffusion equation  
89 when rate constants are spatially homogeneous (Smith and Simmons, 2001). This allowed us to constrain mass-  
90 action model parameters using experimental estimates of the mean and variance of particle positions from imaging  
91 experiments (see *Methods*).

92 For example, with a compartment length of  $1 \mu\text{m}$ , the simulations in figure 1D gave mean particle velocities of  
93  $15 \mu\text{m}$  per minute, which is within the range of experimental observations for microtubule transport (Rogers and  
94 Gelfand, 1998; Dyne and Steward, 2007; Müller et al., 2008). The variances of the particle distributions depended  
95 on whether unidirectional runs are assumed, and respectively grew at a rate of  $\sim 0.58$  and  $\sim 1.33 \mu\text{m}^2$  per second for  
96 the top and bottom panel of 1D. The mass action model provides a good fit to cases (Figure 1F). In general, the  
97 apparent diffusion coefficient of the model increases as run length increases (Figure 1 Supplement, 1A). The fit of the  
98 mass-action model decreases as the run length increases. However, the model remains a reasonable approximation  
99 for many physiological run lengths and particle numbers, even over a relatively short time window of 100 seconds  
100 (Figure 1 Supplement, 1B).

## 101 **Biophysical formulation of the sushi belt model**

102 The advantage of the mass action model is that it easily extends to complex morphologies with spatially non-uniform  
103 trafficking rates, and can accommodate additional processes, including sequestration of cargo. The sushi-belt model  
104 (Doyle and Kiebler, 2011) proposes that local mechanisms modify local trafficking rates and capture cargo as it  
105 passes. For these local signals to encode the demand for cargo, some feedback mechanism must exist between the  
106 local concentration of cargo and the signal itself. There are many biologically plausible mechanisms for locally  
107 encoding demand (see *Methods*). For our main results, we did not focus on these implementation details and simply  
108 assumed a reliable local demand signal. We have thus addressed the performance of the transport mechanism per se,

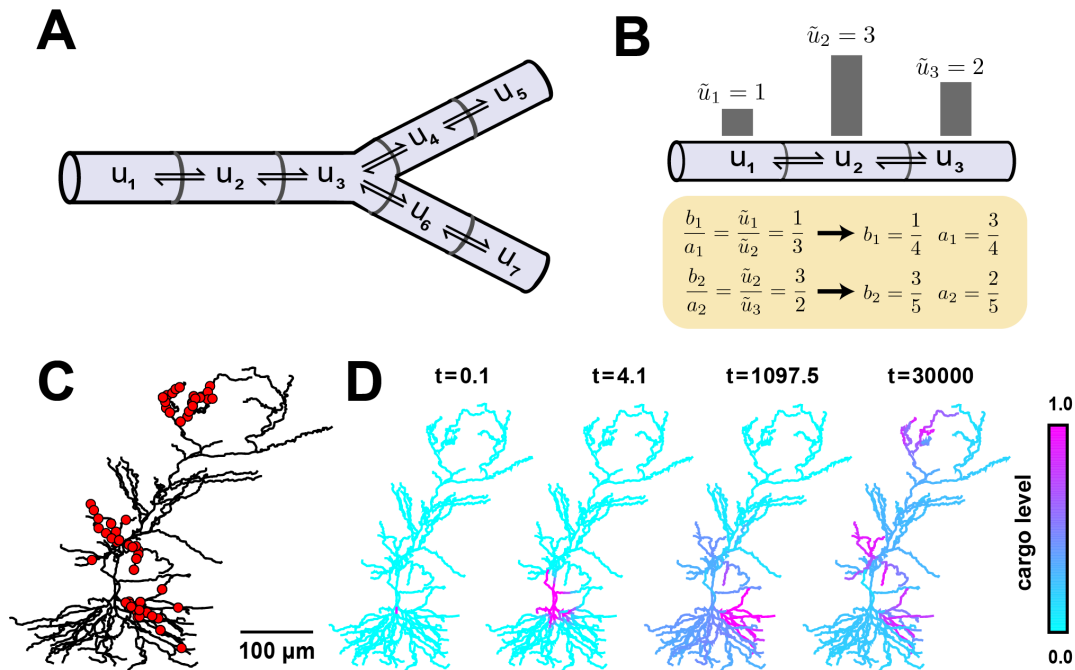

**Figure 2.** Local trafficking rates determine the spatial distribution of biomolecules by a simple kinetic relationship. (A) The mass action transport model for a simple branched morphology. (B) Demonstration of tuning trafficking rates to distribute cargo to match a demand signal. Each pair of rate constants ( $\{a_1, b_1\}$ ,  $\{a_2, b_2\}$ ) was constrained to sum to one. This constraint, combined with the condition in equation (4) specifies a unique solution to achieve the demand profile. (C) A model of a CA1 pyramidal cell with 742 compartments adapted from Migliore and Migliore (2012). Spatial cargo demand was set proportional to the average membrane potential deflection due to excitatory synaptic input applied at the locations marked by red dots. (D) Convergence of the cargo concentration in the CA1 model over time,  $t$  (arbitrary units).

109 under the most forgiving assumptions about how reliably demand is encoded.

110 The mass action model of sushi-belt transport is:

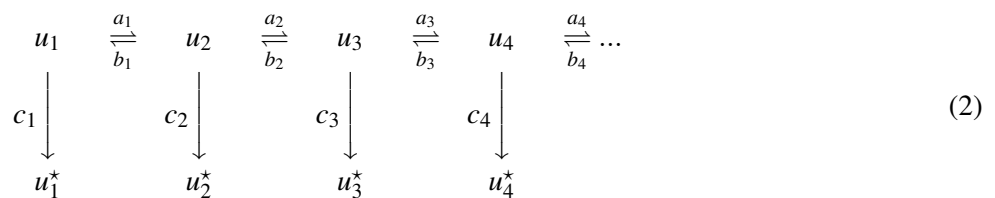

111 where  $u$  represents the concentration of cargo on the network of microtubules, indexed by the compartment. In each  
 112 compartment, molecules can irreversibly detach from the microtubules in a reaction  $u_i \xrightarrow{c_i} u_i^*$ , where  $u^*$  denotes the  
 113 detached cargo. Biologically, cargo will eventually degrade. However, in this study we are concerned with how  
 114 cargo can be rapidly distributed so that detached cargo can satisfy demand for at least some time. Therefore, for  
 115 simplicity we assume degradation rates are effectively zero.

116 In the limiting case where detachment rates also approach zero, we only need to consider trafficking between  
 117 compartments, as shown in Figure 2A. Over time, concentrations of microtubule-bound cargo in each compartment  
 118 approach steady-state, which occurs when the ratio of cargo between neighboring compartments is balanced by the

119 trafficking rates:

$$\frac{u_p}{u_c} \Big|_{ss} = \frac{b}{a} \quad (3)$$

120 where  $u_p$  is the level in a “parent” compartment (closer to soma),  $u_c$  is the level in the adjacent “child” compartment  
121 (closer to periphery) and  $b$  and  $a$  are the trafficking rate constants between these compartments.

122 If  $\tilde{u}_i$  represents the local demand signal in compartment  $i$ , then equation (3) gives the condition for cargo  
123 distribution to match demand:

$$\frac{b}{a} = \frac{\tilde{u}_p}{\tilde{u}_c} \quad (4)$$

124 An example demand profile and the corresponding trafficking rate relationships are shown in Figure 2B. This  
125 condition ensures that cargo is delivered in proportion to local demand. The absolute concentration at steady-state is  
126 determined by the total amount of cargo produced (Figure 2, supplement 1); in the case of mRNA, this might be  
127 controlled at the somatic compartment by transcriptional regulation. In this paper, we mainly focus on the relative  
128 accuracy of cargo distribution when some fixed amount of cargo is produced at the soma.

129 To illustrate demand-modulated trafficking in a realistic setting, we used a reconstructed model of a CA1  
130 pyramidal neuron (Migliore and Migliore, 2012). To provide a demand signal, we modeled excitatory synaptic  
131 input at 120 locations within three dendritic regions (red dots, Fig. 2D) and set demand, ( $\tilde{u}_i$ ), equal to the average  
132 membrane potential in each electrical compartment (see *Methods*). As expected, cargo was transported selectively to  
133 regions of high synaptic activity (Fig. 2E, Supp. Movie 1), matching the demand profile exactly at steady state (Fig.  
134 2F). Therefore, local control of trafficking rates (equivalently, motor protein kinetics) can deliver cargo to match  
135 arbitrarily complex spatial demand.

### 136 **Transport bottlenecks occur when trafficking rates are non-uniform**

137 If cargo delivery is achieved by controlling trafficking along microtubules, then delivery times to distal sites will be  
138 affected by proximal demand. For example, if the demand signal  $\tilde{u}_i$  approaches zero in a compartment, the trafficking  
139 rates into that compartment also approach zero, cutting off the flow of cargo along the neurite (Fig 3A). The smallest  
140 demand signal,  $\epsilon$  often determines the rate-limiting time constant for cargo delivery to an entire dendritic tree. We  
141 refer to this scenario as a “transport bottleneck.” Figures 3B-C illustrate how decreasing  $\epsilon$  to zero causes arbitrarily  
142 slow convergence in a simple 3-compartment model with all other trafficking rates normalized to 1.

143 We imposed a bottleneck in the reconstructed CA1 model by setting demand in the middle third of the apical  
144 dendrite to a lower level than the rest of the dendritic tree, which was set uniformly high. As expected, the cargo  
145 distribution converged much more quickly for uniform demand than with a bottleneck present (Fig. 3D).

146 However, less intuitive effects are seen on the convergence times of cargo in specific compartments. Figure  
147 3E plots convergence time for  $u_i$  to reach a fraction of the steady state value for all compartments. While distal  
148 compartments showed prolonged convergence times, (Fig. 3E, upper right portion of plot), the bottleneck *shortened*  
149 the transport delay to proximal compartments (Fig. 3E, lower left portion of plot). This occurs because the bottleneck  
150 decreases the effective size of proximal part the neuron: cargo spreads efficiently throughout the proximal dendrites,  
151 but traverses the bottleneck more slowly.

152 Another counterintuitive effect is seen when demand varies independently at proximal and distal locations, as  
153 might occur during selective synaptic stimulation (see e.g., Han and Heinemann, 2013). In Figure 3F we simulated  
154 demand at proximal and distal portions of the apical dendrite independently and quantified the total convergence

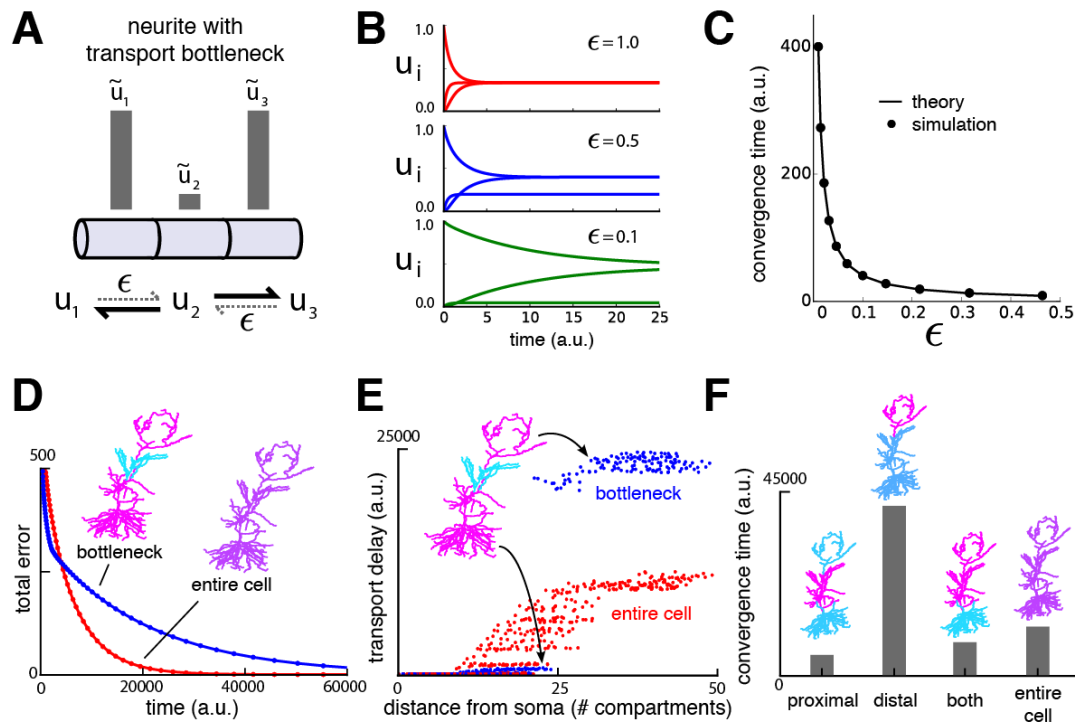

**Figure 3.** Transport bottlenecks caused by local demand profile. (A) A three-compartment transport model, with the middle compartment generating a bottleneck. The vertical bars represent the desired steady-state concentration of cargo in each compartment. The rate of transport into the middle compartment is small ( $\epsilon$ , dashed arrows) relative to transport out of the middle compartment. (B) Convergence of cargo concentration in all compartments of model in (A) for decreasing relative bottleneck flow rate,  $\epsilon$ . (C) Simulations (black dots) confirm that the time to convergence is given by the smallest non-zero eigenvalue of the system (solid curve). (D) Convergence to a uniform demand distribution (red line) is faster than a target distribution containing a bottleneck (blue line) in the CA1 model. Total error is the sum of the absolute difference in concentration from demand ( $L_1$  norm). Neuron morphologies are color-coded according to steady state cargo concentration. (E) Transport delay for each compartment in the CA1 model (time to accumulate 0.001 units of cargo). (F) Bar plot comparison of convergence times for different spatial demand distributions in the CA1 model (steady-state indicated in color plots). The timescale for all simulations in the CA1 model was normalized by setting  $a_i + b_i = 1$  for each compartment.

155 time. Proximal demand alone (Fig. 3F ‘proximal’) resulted in the fastest convergence time. Convergence was  
 156 slowest when the demand was restricted to distal dendrites (Fig. 3F, ‘distal’). Interestingly, when both distal and  
 157 proximal sites signalled demand (Fig. 3F ‘both’), convergence was substantially faster, even though cargo still  
 158 needed to reach the distal neurites. Uniform demand across the entire tree (Fig. 3F ‘entire cell’) resulted in a similar  
 159 shortening of convergence time.

160 Together, these results show that locally modulating trafficking movements will have testable effects on global  
 161 transport times. The presence and relative contribution of this mechanism can be probed experimentally by  
 162 characterizing the convergence rate of a cargo that aggregates at recently activated synapses, such as *Arc* mRNA  
 163 (Steward et al., 1998).

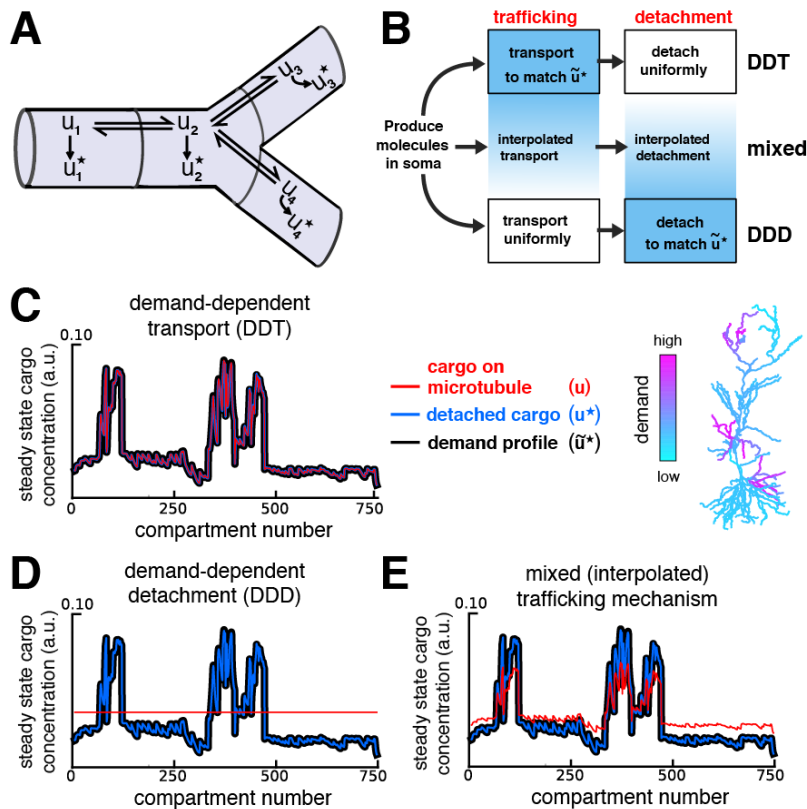

**Figure 4.** Multiple strategies for transport with trafficking and cargo detachment controlled by local signals. (A) Schematic of microtubular transport model with irreversible detachment in a branched morphology. (B) Multiple strategies for trafficking cargo to match local demand (demand =  $\tilde{u}^*$ ). (Top) The demand-dependent trafficking mechanism (DDT). When the timescale of detachment is sufficiently slow, the distribution of cargo on the microtubules approaches a quasi-steady-state that matches  $\tilde{u}^*$  spatially. This distribution is then transformed into the distribution of detached cargo,  $u^*$ . (Bottom) The demand dependent detachment (DDD) mechanism. Uniform trafficking spreads cargo throughout the dendrites, then demand is matched by slowly detaching cargo according to the local demand signal. An entire family of mixed strategies is achieved by interpolating between DDT and DDD. (C-E) Quasi-Steady-state distribution of cargo on the microtubules ( $u$ , red) and steady-state distribution of detached cargo ( $u^*$ , blue), shown with a demand profile ( $\tilde{u}^*$ , black) for the various strategies diagrammed in panel B. The demand profile is shown spatially in the color-coded CA1 neuron in the right of panel C. Detached cargo matches demand in all cases.

#### 164 Local control of trafficking and detachment results in a family of trafficking strategies

165 We next considered how detachment rates can be controlled by local demand signals. If trafficking is much faster  
 166 than detachment ( $a, b \gg c$ ), then the previous analysis remains valid because the distribution of  $u$  approaches a  
 167 quasi-steady state that matches demand along the microtubules; cargo may then detach at a slow, nonspecific rate  
 168 ( $c_i = \text{constant}$ , with  $c \ll a, b$ ). Figure 4C shows an example of this scenario, which we call *demand-dependent*  
 169 *trafficking* (DDT). The spatial distribution of cargo is first achieved along the microtubules (red line, Fig. 4C), and  
 170 maintained as cargo detaches (blue line, Fig. 4C).

171 In another limiting case, trafficking rates are spatially uniform ( $a_i = b_i$ ) so that cargo spreads evenly along the



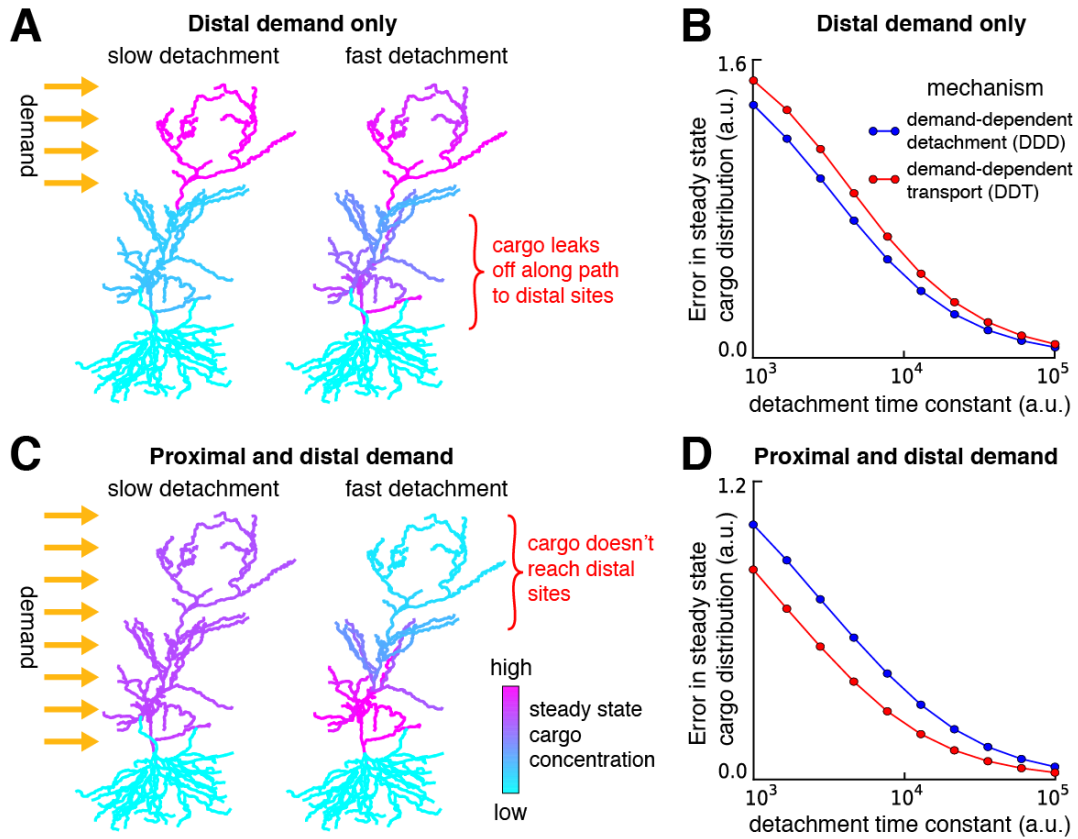

**Figure 5.** Tradeoffs in the performance of trafficking strategies depends on the spatial pattern of demand. **(A)** Delivery of cargo to the distal dendrites with slow (*left*) and fast detachment rates (*right*) in a reconstructed CA1 neuron. The achieved pattern does not match the target distribution when detachment is fast, since some cargo is erroneously delivered to proximal sites. **(B)** Tradeoff curves between spatial delivery error and convergence rate for the DDD and DDT trafficking strategies (blue line, see Fig 4D; red line, see Fig 4C). **(C-D)** Same as **(A-B)** but with a demand throughout proximal and distal locations. The timescale of all simulations was set by imposing the constraint that  $a_i + b_i = 1$  for each compartment to permit comparison.

172 microtubules. The demand profile is then satisfied if local detachment rates are proportional to the demand level,  $\tilde{u}^*$ :

$$c_i \propto \frac{\tilde{u}_i^*}{\tilde{u}_i} \quad (5)$$

173 The result of this strategy, which we call *demand-dependent detachment* (DDD), is shown in Figure 4D. Unlike  
 174 DDT, DDD avoids the transport bottlenecks examined in Figure 3, and can achieve target patterns with  $\tilde{u}^*$  equal to  
 175 zero in certain compartments by setting  $c_i = 0$ .

176 The model can capture mixed transport strategies between these two extremes by interpolating the relationships  
 177 between local demand, trafficking and transport rates (see *Methods*). Figure 4E shows the behavior of an intermediate  
 178 model, whose parameters are a linear interpolation between pure DDT and DDD.

## 179 **Rapid cargo delivery in the sushi-belt model is error-prone**

180 Although it is mathematically convenient to separate the timescales of trafficking and detachment in the model, this  
181 separation may not exist in biological systems tuned for rapid transport. However, removal of timescale separation  
182 in the sushi-belt model results in mistargeted delivery of cargo, as we now show.

183 We returned to the CA1 model of Figure 4 and considered a scenario where there is demand for cargo at the distal  
184 apical dendrites (Fig. 5A). If the detachment rate constants are sufficiently slow, then, as before, delivered cargo  
185 matched demand nearly exactly in both the DDT and DDD models (Fig. 5A, left). However, increasing detachment  
186 rates led to faster convergence, but resulted in cargo leaking off the microtubule on the way to its destination (Fig.  
187 5A, right). Thus, for a fixed trafficking timescale there is a tradeoff between the speed and accuracy of cargo delivery.  
188 The tradeoff curve shown in figure 5B (top) shows that both accuracy and convergence time decreased smoothly  
189 as the detachment rates were increased. This tradeoff was present regardless of whether the trafficking rates (Fig.  
190 5B, red line) or detachment rates (Fig. 5B, blue line) were modified to meet demand (compare to Fig. 4C and  
191 4D, respectively). However, DDD outperformed DDT overall, because the latter caused bottlenecks in proximal  
192 dendrites.

193 When the entire apical tree was stimulated, fast detachment prevented cargo delivery to distal synaptic sites (Fig.  
194 5C, right). As before, a smooth speed-accuracy tradeoff is present for both transport strategies (Fig. 5D), but in  
195 contrast to distal demand alone, the DDT model outperformed DDD in this scenario (in contrast to Fig. 5A-B).  
196 Intuitively, DDT is better in this case because DDD results in cargo being needlessly trafficked to the basal dendrites.

197 Together, these results show that increasing the speed of cargo delivery comes at the cost of accuracy, and that  
198 the performance of different trafficking strategies depends on the spatial profile of demand. A family of models  
199 captures many possible variants of the sushi belt model with different relationships between the rates of underlying  
200 trafficking and detachment processes. This allowed us to assess how well trafficking can be expected to perform  
201 globally, without confining the results to specific cases.

202 We systematically estimated the severity of the speed-accuracy trade-off for biologically realistic neurite lengths  
203 and trafficking kinetics, with various spatial distributions of demand. Best-case estimates of drift-diffusion parameters  
204 predicted a severe tradeoff: a delay of 1 day to deliver cargo with 10% average error, and roughly a week to deliver  
205 within 1% average error (Figure 5 supplement 1, Supplemental movies 2-3).

## 206 **Fine-tuned trafficking rates and cargo recycling introduce new tradeoffs**

207 We asked whether the speed-precision tradeoff could be overcome by fine-tuning trafficking parameters or allowing  
208 cargo to be recycled instead of irreversibly detached.

209 First, we considered the effect of tuning anterograde trafficking rates to boost delivery to distal dendrites. We  
210 examined a realistic neurite length (800  $\mu\text{m}$ ; Figure 5 supplement 1, supplemental movie 4). Tuning the trafficking  
211 rates using a linear spatial gradient provided accurate and fast delivery (within 10% error in 200 minutes) when  
212 cargo demand was even along the cable. However, trafficking was very sensitive to changes in the spatial pattern  
213 of demand. Randomly altering the spatial profile of demand resulted in speed/precision performance that was  
214 comparable or worse than the untuned trafficking mechanisms, whose performance less sensitive to demand patterns  
215 (Figure 5, supplement 1, panels D-E).

216 Second, we considered a variant of the sushi-belt model that allowed for the reversible detachment/reattachment

217 of cargo from the microtubules (Figure 5, supplement 2):

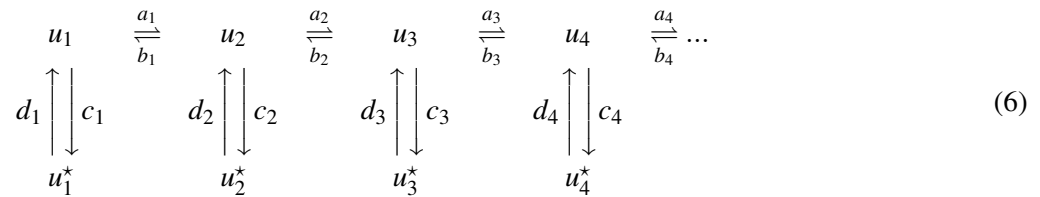

218 Inspection of this scheme reveals that it is similar in form to the DDT model analyzed in figures 2 & 3: the reversible  
 219 detachment step simply adds an additional transient state in each compartment. As we noted in the DDT model,  
 220 cargo distributions can match demand over time with arbitrarily low error (see equation 4). However, transport delays  
 221 still exist. While releasing cargo to the wrong location is not an irreversible error, it slows delivery by temporarily  
 222 arresting movement — known as a “diffusive trap” (see e.g. Bressloff and Earnshaw, 2007).

223 Cargo recycling creates a new tradeoff between delivery speed and excess cargo that has not found a destination.  
 224 Models that deliver a high percentage of their cargo ( $c_i > d_i$ ) converged on a similarly slow timescale to the  
 225 canonical sushi-belt model, since they greedily release cargo into the diffusive traps. Constraining excess cargo to  
 226 10% requires more than  $\sim 10^3$  minutes for the demand profile to be matched within 10% (Figure 5, supplement 2).  
 227 Models that deliver less cargo ( $c_i \approx d_i$ ) are less efficient in terms of cargo utilization, but have faster convergence.  
 228 Achieving a convergence time roughly ten times faster required more than 90% of all cargo to remain in transit at  
 229 steady state.

### 230 **Distinct cell-type morphologies face order of magnitude differences in speed, precision and effi-** 231 **ciency of trafficking**

232 We wanted to see how these generic relationships between speed, precision and excess cargo affected global transport  
 233 in different, realistic morphologies. We therefore implemented the families of sushi-belt models in representative  
 234 morphologies from five cell types, spanning size and dendritic complexity (Fig. 6A). We simulated trafficking  
 235 and delivery of cargo to a spatially uniform target distribution in each cell type to reveal morphology-dependent  
 236 differences. In all cases we used optimistic estimates of transport kinetics, corresponding to a diffusion coefficient of  
 237  $10 \mu\text{m}^2\text{s}^{-1}$ .

238 Figure 6B shows spatial plots of the distribution of cargo on the microtubules ( $u_i$ , cyan-to-magenta colormap)  
 239 and the distribution of delivered cargo ( $u_i^*$ , black-to-orange colormap) for a model with an irreversible detachment  
 240 rate of  $8 \times 10^{-5} \text{ s}^{-1}$ . These parameters produce a relatively slow release of cargo — for each morphology, a sizable  
 241 fraction of the cargo remains on the microtubules at  $\sim 3$  hours, and it takes  $\sim 1$ -2 days to release all of the cargo  
 242 (Supp. Fig. 2). While the speed of delivery is roughly equivalent, the accuracy varied across the neural morphologies.  
 243 The hippocampal granule cell converged to very low error ( $\sim 11.7\%$  mean error), while the larger L5 pyramidal cell  
 244 converged to  $\sim 27.7\%$  error. The smaller, but more elaborately branched, Purkinje cell converged to a similarly high  
 245 average error of  $\sim 29.1\%$ .

246 As before, faster detachment rates produce faster, but less accurate, delivery; while slower detachment rates  
 247 produce more accurate, but slower, delivery. These tradeoffs across the entire family of regimes are plotted in Fig.  
 248 6C (left). Adding a reattachment process largely preserved the effect of morphology on transport tradeoffs (Fig. 6C,  
 249 right). We fixed the detachment rate to be fast (equally fast as trafficking between two  $1 \mu\text{m}$  compartments), which  
 250 is again an optimistic scenario. A tradeoff between excess cargo and speed of delivery emerged as the reattachment

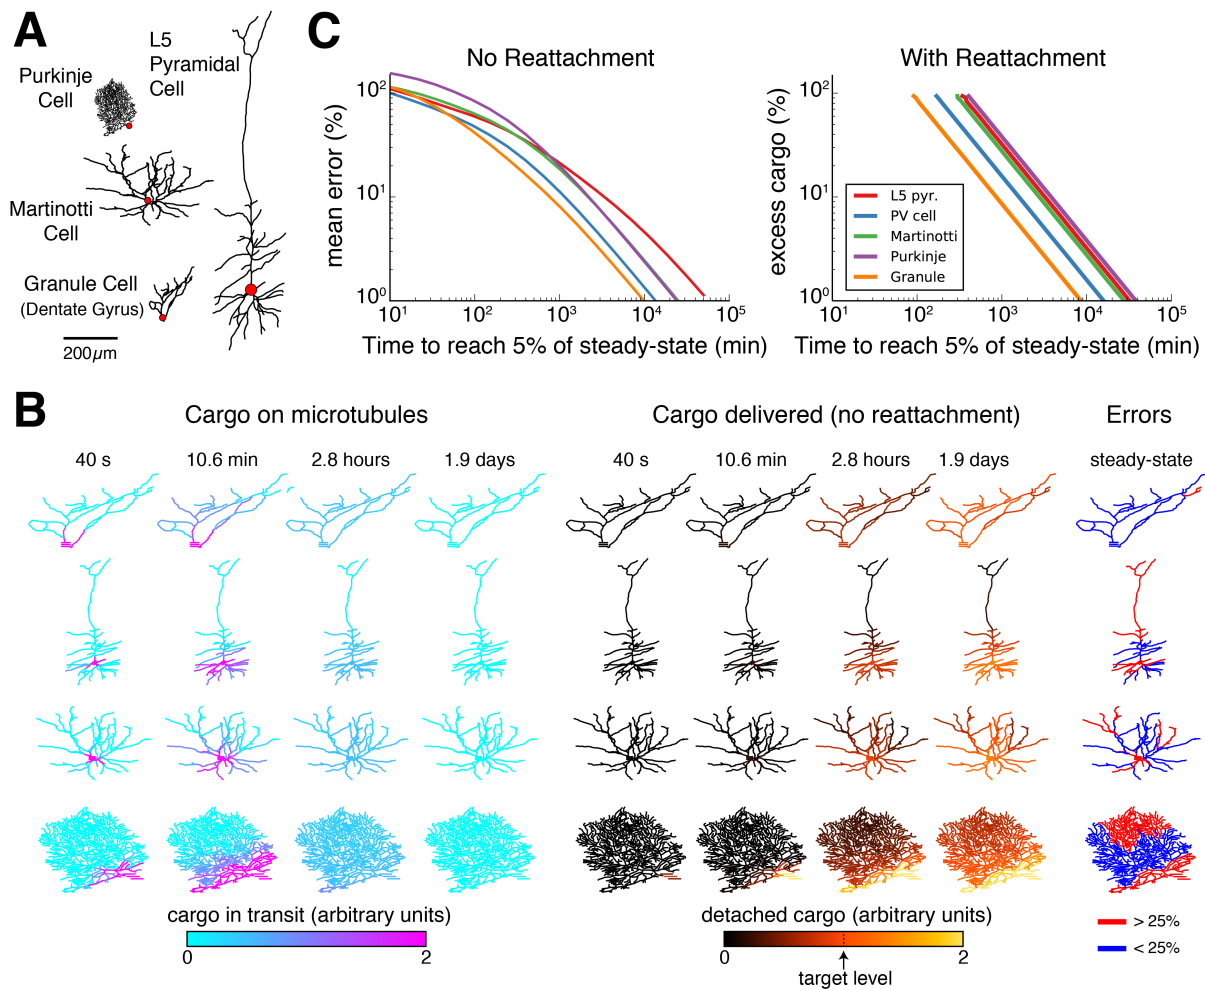

**Figure 6.** Effect of morphology on trafficking tradeoffs. **(A)** Representative morphologies from four neuron types, drawn to scale. The red dot denotes the position of the soma (not to scale). **(B)** Distribution of cargo on the microtubules ( $u_i$ ) and delivered cargo ( $u_i^*$ ) at four time points for sushi-belt model with irreversible detachment. Cargo originated in the soma and was transported to a uniform distribution (all  $a_i = b_i$ , normalized to a diffusion coefficient of  $10 \mu\text{m}^2 / \text{s}$ ); the detachment rate was spatially uniform and equal to  $8 \times 10^{-5} \text{s}^{-1}$ . **(C)** Tradeoff curves for achieving a uniform distribution of cargo in realistic morphologies. The sushi-belt model without reattachment (as introduced in Fig. 4) suffers a tradeoff in speed and accuracy, while including reattachment (as in Fig. 7) produces a similar tradeoff between speed and excess “left-over” cargo. An optimistic diffusion coefficient of  $10 \mu\text{m}^2 \text{s}^{-1}$  was used in both cases. For simulations with reattachment, the detachment rate ( $c_i$ ) was set equal to trafficking rates ( $a_i, b_i$ ) for a 1 micron compartment. The detachment rate was increased linearly in proportion to compartment length in order to model a spatially uniform capture process.

251 rate was varied (Fig. 6C, right) and were most severe for the Purkinje cell and L5 pyramidal cell, and least severe  
 252 for the Granule cell. Morphology itself therefore influences the relationship between delivery speed and precision,  
 253 and/or excess cargo required, suggesting that different cell types might exploit different trafficking strategies.

## 254 DISCUSSION

255 The molecular motors that drive intracellular transport are remarkably efficient, achieving speeds of approximately  
256  $15 \mu\text{m}$  per minute (Rogers and Gelfand, 1998; Dyne and Steward, 2007; Müller et al., 2008). A naïve calculation  
257 based on this figure might suggest that subcellular cargo can be delivered within a few hours in most dendritic trees.  
258 However, this ignores the stochastic nature of biochemical processes — motors spontaneously change directions and  
259 cargo can be randomly delivered to the wrong site. Such chance events are inevitable in molecular systems, and in  
260 the case of active transport they lead to diffusion of bulk cargo in addition to directed movement. If this kind of  
261 biochemical stochasticity played out in the sushi restaurant analogy, then the waiting time for a dish wouldn't simply  
262 equate to the time taken for the chef to prepare the dish and for the belt to convey it. Instead, the restaurant would be  
263 beleaguered by fickle customers who pick up dishes they do not want, either withholding them for an indefinite  
264 period, or setting them on another belt destined for the kitchen.

265 Mathematical models provide a rigorous framework to test the plausibility and inherent relationships in concep-  
266 tual models. Our study formalized the foremost conceptual model of dendritic transport (Doyle and Kiebler, 2011)  
267 to account for trafficking in realistic dendritic morphologies. Over a wide range of assumptions the model exhibits  
268 inherent and surprisingly punishing trade-offs between the accuracy of cargo delivery and the time taken to transport  
269 it over these morphologies. Using conservative estimates based on experimental data, the canonical sushi-belt model  
270 predicts delays of many hours or even days to match demand within 10%. Producing excess cargo and permitting  
271 reversible detachment from the microtubules can mitigate this tradeoff, but at substantial metabolic cost, since a  
272 large amount of excess cargo is required.

273 These predictions are unsettling, because nucleus-to-synapse transport appears to play a role in time-critical  
274 processes. Elevated synaptic activity can initiate distal metabolic events including transcription (Kandel, 2001;  
275 Deisseroth et al., 2003; Greer and Greenberg, 2008; Ch'ng and Martin, 2011) and this has been shown to be an  
276 important mechanism of neuronal plasticity (Nguyen et al., 1994; Frey and Morris, 1997, 1998; Bading, 2000;  
277 Kandel, 2001; Redondo and Morris, 2011). Moreover, neuronal activity has been observed to influence trafficking  
278 directly through second-messengers (Mironov, 2007; Wang and Schwarz, 2009; Soundararajan and Bullock, 2014),  
279 consistent with the hypothesis that trafficking rates are locally controlled. Genes that are transcribed in response  
280 to elevated activity can regulate synaptic strengths (Flavell and Greenberg, 2008; Bloodgood et al., 2013; Spiegel  
281 et al., 2014), and it has recently been suggested that nucleus-to-synapse trafficking of Arc directly regulates synaptic  
282 plasticity (Okuno et al., 2012). None of these findings imply that all kinds of molecular cargo are transported from  
283 the soma to distal dendritic locations, since mRNA can be sequestered and locally synthesized within dendrites  
284 (Kang and Schuman, 1996; Cajigas et al., 2012; Holt and Schuman, 2013). However, the speed, precision and  
285 efficiency tradeoffs revealed in the sushi belt model provide a principled way to understand why some processes  
286 might require local biosynthesis, while others operate globally.

287 The different ways that local demand signals can influence trafficking and detachment can impact global  
288 performance, sometimes non-intuitively. Many of these effects should be experimentally testable. For example,  
289 transport bottlenecks can be induced if demand signals target local trafficking rates along microtubules (the DDT  
290 model). Transport to distal compartments will be substantially faster when proximal demand is introduced (see Fig.  
291 3). On the other hand, uniform trafficking combined with locally controlled detachment (DDD model, Fig. 4D)  
292 can avoid bottlenecks, and often leads to faster transport. However, this is not always the case, as was shown in  
293 figure 5D, where uniform trafficking is slower/inaccurate because cargo explores the basal dendritic tree even though

294 there is no demand in that region. Spatial tuning of trafficking speed permitted more efficient cargo delivery in the  
295 model. However, this has yet to be observed experimentally and would require extremely stereotyped morphology  
296 and physiological needs for it to be effective.

297 Intuitively, speed/precision/excess cargo tradeoffs arise because there is a conflict between exploring the dendritic  
298 tree for dropoff locations, capturing cargo in its current position and making sufficient excess cargo available to  
299 buffer local availability. For irreversible cargo detachment, the capture rate needs to be roughly an order of magnitude  
300 slower than trafficking, otherwise, compartments proximal to the soma receive disproportionately high levels of  
301 cargo. This scaling is unfavorable for achieving high accuracy: if it takes roughly 100 minutes to distribute cargo  
302 throughout the dendrites, it will take roughly 1000 minutes (16-17 hours) before the cargo dissociates and is delivered  
303 to the synapses. If, instead, cargo is able to reattach, then fast reattachment favors exploration at the cost of greater  
304 excess (i.e. non-utilized) cargo, while slow reattachment hinders transport, since more cargo is detached and thus  
305 immobile. Even when the vast majority of cargo is produced as excess, global delivery times of several hours persist.  
306 Furthermore, if a neuron needs to rapidly replace a cargo that is already present in high concentrations, the strategy  
307 of generating excess cargo will result in large dilution times.

308 Overall, our results show that there are multiple ways that neurons can distribute cargo, but each differs in its  
309 speed, accuracy and metabolic cost. Therefore, optimizing for any one of these properties comes at the expense  
310 of the others. For example, in the model without reattachment (Fig. 4), the same distribution of cargo can be  
311 achieved by: (a) location-dependent trafficking followed by uniform release, (b) uniform trafficking followed by  
312 location-dependent release, or (c) a mixture of these two strategies. Experimental findings appear to span these  
313 possibilities. Kim and Martin (2015) identified three mRNAs that were uniformly distributed in cultured *Aplysia*  
314 sensory neurons, but were targeted to synapses at the level of protein expression by localized translation (supporting  
315 option *b*). In contrast, the expression of *Arc* mRNA is closely matched to the pattern of Arc protein in granule cells  
316 of the dentate gyrus (possibly supporting option *a*; Steward et al., 1998; Farris et al., 2014; Steward et al., 2015).  
317 Trafficking kinetics do not just differ according to cargo identity — the same type of molecular cargo can exhibit  
318 diverse movement statistics in single-particle tracking experiments (Dynes and Steward, 2007). These differences  
319 lead us to speculate that different neuron types and different cargoes have adapted trafficking strategies that match  
320 performance tradeoffs to biological needs.

321 It is possible that active transport in biological neurons will be more efficient and flexible than models predict.  
322 For this reason, it is crucial to explore, quantitatively, the behavior of existing conceptual models by replacing  
323 words with equations so that we can see where discrepancies with biology might arise. More generally, conceptual  
324 models of subcellular processes deserve more quantitative attention because they can reveal non-obvious constraints,  
325 relationships and connections to other biological and physical phenomena (Smith and Simmons, 2001; Bressloff,  
326 2006; Fedotov and Méndez, 2008; Newby and Bressloff, 2010b; Bhalla, 2011; Bressloff and Newby, 2013; Bhalla,  
327 2014). Other modeling studies have focused on the effects of stochasticity and local trapping of cargo on a  
328 microscopic scale, particularly in the setting of low particle numbers (Bressloff, 2006; Bressloff and Earnshaw,  
329 2007; Fedotov and Méndez, 2008; Newby and Bressloff, 2010b; Bressloff and Newby, 2013). We opted for a  
330 coarse-grained class of models in order to examine transport and delivery across an entire neuron. The model  
331 we used is necessarily an approximation: we assumed that cargo can be described as a concentration and that the  
332 multiple steps involved in cellular transport can be lumped together in a mass action model.

333 By constraining trafficking parameters based on prior experimental measurements, we revealed physiologically

334 important tradeoffs across a variety of assumptions. It is an open and crucial question whether these modeling  
 335 predictions hold biologically. Experimental falsification would prompt revision of the underlying models as well  
 336 as our conceptual understanding of intracellular transport. On the other hand, experimental confirmation of these  
 337 tradeoffs would have fundamental consequences for theories of synaptic plasticity and other physiological processes  
 338 that are thought to require efficient nucleus-to-synapse trafficking.

## 339 METHODS

340 All simulation code is available online: <https://github.com/ahwillia/Williams-et-al-Synaptic-Transport>

### 341 Model of single-particle transport

342 Let  $x_n$  denote the position of a particle along a 1-dimensional cable at timestep  $n$ . Let  $v_n$  denote the velocity of  
 343 the particle at timestep  $n$ ; for simplicity, we assume the velocity can take on three discrete values,  $v_n = \{-1, 0, 1\}$ ,  
 344 corresponding to a retrograde movement, pause, or anterograde movement. As a result,  $x_n$  is constrained to take on  
 345 integer values. In the memoryless transport model (top plots in Fig. 1B, 1D, and 1F), we assume that  $v_n$  is drawn  
 346 with fixed probabilities on each step. The update rule for position is:

$$x_{n+1} = x_n + v_n$$

347

$$v_{n+1} = \begin{cases} -1 & \text{with probability } p_- \\ 0 & \text{with probability } p_0 \\ 1 & \text{with probability } p_+ \end{cases}$$

348 We chose  $p_- = 0.2$ ,  $p_0 = 0.35$  and  $p_+ = 0.45$  for the illustration shown in Figure 1. For the model with  
 349 history-dependence (bottom plots in Fig. 1B, 1D, and 1F), the movement probabilities at each step depend on the  
 350 previous movement. For example, if the motor was moving in an anterograde direction on the previous timestep,  
 351 then it is more likely to continue to moving in that direction in the next time step. In this case the update rule is  
 352 written in terms of conditional probabilities:

$$v_{n+1} = \begin{cases} -1 & \text{with probability } p(-|v_n) \\ 0 & \text{with probability } p(0|v_n) \\ 1 & \text{with probability } p(+|v_n) \end{cases}$$

353 In the limiting (non-stochastic) case of history-dependence, the particle always steps in the same direction as the  
 354 previous time step.

|                   | $v_n = -1$ | $v_n = 0$ | $v_n = 1$ |
|-------------------|------------|-----------|-----------|
| $p(v_{n+1} = -1)$ | 1          | 0         | 0         |
| $p(v_{n+1} = 0)$  | 0          | 1         | 0         |
| $p(v_{n+1} = 1)$  | 0          | 0         | 1         |

355 We introduce a parameter  $k \in [0, 1]$  to linearly interpolate between this extreme case and the memoryless model.

|                   | $v_n = -1$     | $v_n = 0$      | $v_n = 1$      |
|-------------------|----------------|----------------|----------------|
| $p(v_{n+1} = -1)$ | $p_-(1-k) + k$ | $p_-(1-k)$     | $p_-(1-k)$     |
| $p(v_{n+1} = 0)$  | $p_0(1-k)$     | $p_0(1-k) + k$ | $p_0(1-k)$     |
| $p(v_{n+1} = 1)$  | $p_+(1-k)$     | $p_+(1-k)$     | $p_+(1-k) + k$ |

(7)

356 The bottom plots of figure 1B, 1D were simulated with  $k = 0.5$ .

357 To estimate the concentration and spatial distribution of cargo in real units, we used a  $1 \mu\text{m}/\text{s}$  particle velocity  
 358 and a 1 second time step to match experimental estimates of kinesin (Klumpp and Lipowsky, 2005, and references).  
 359 We assumed a dendritic diameter of  $7.2705 \mu\text{m}$ .

### 360 Relationship of single-particle transport to the mass-action model

361 The mass-action model (equation 1, in the *Results*) simulates the bulk movement of cargo across discrete compart-  
 362 ments. Cargo transfer is modeled as an elementary chemical reaction obeying mass-action kinetics (Keener and  
 363 Sneyd, 1998). For an unbranched cable, the change in cargo in compartment  $i$  is given by:

$$\dot{u}_i = au_{i-1} + bu_{i+1} - (a+b)u_i \quad (8)$$

364 For now, we assume that the anterograde and retrograde trafficking rate constants ( $a$  and  $b$ , respectively) are spatially  
 365 uniform.

The mass-action model can be related to a drift-diffusion partial differential equation (Fig. 1E) by discretizing  $u$  into spatial compartments of size  $\Delta$  and expanding around some position,  $x$ :

$$\dot{u}(x) \approx a \left[ u(x) - \Delta \frac{\partial u}{\partial x} + \frac{\Delta^2}{2} \frac{\partial^2 u}{\partial x^2} \right] + b \left[ u(x) + \Delta \frac{\partial u}{\partial x} + \frac{\Delta^2}{2} \frac{\partial^2 u}{\partial x^2} \right] - (a+b) u(x) \quad (9)$$

$$= a \left[ -\Delta \frac{\partial u}{\partial x} + \frac{\Delta^2}{2} \frac{\partial^2 u}{\partial x^2} \right] + b \left[ \Delta \frac{\partial u}{\partial x} + \frac{\Delta^2}{2} \frac{\partial^2 u}{\partial x^2} \right] \quad (10)$$

366 We keep terms to second order in  $\Delta$ , as these are of order  $dt$  in the limit  $\Delta \rightarrow 0$  (Gardiner, 2009). This leads to a  
 367 drift-diffusion equation:

$$\dot{u}(x) = \frac{\partial u}{\partial t} = \underbrace{(b-a)}_{\text{drift coefficient}} \frac{\partial u}{\partial x} + \underbrace{\left( \frac{a+b}{2} \right)}_{\text{diffusion coefficient}} \frac{\partial^2 u}{\partial x^2} \quad (11)$$

368 Measurements of the mean and mean-squared positions of particles in tracking experiments, or estimates of the  
 369 average drift rate and dispersion rate of a pulse of labeled particles can thus provide estimates of parameters  $a$  and  $b$ .

370 How does this equation relate to the model of single-particle transport (Fig. 1A-B)? For a memoryless biased  
 371 random walk, the expected position of a particle after  $n$  time steps is  $E[x_n] = n(p_+ - p_-)$  and the variance in position  
 372 after  $n$  steps is  $n(p_+ + p_- - (p_+ - p_-)^2)$ . For large numbers of non-interacting particles the mean and variance  
 373 calculations for a single particle can be directly related to the ensemble statistics outlined above. We find:

$$a = \frac{2p_+ - (p_+ - p_-)^2}{2}$$



374

$$b = \frac{2p_- - (p_+ - p_-)^2}{2}$$

375 This analysis changes slightly when the single-particle trajectories contain long, unidirectional runs. The  
376 expected position for any particle is the same  $E[x_n] = n(p_+ - p_-)$ ; the variance, in contrast, increases as run lengths  
377 increase. However, the mass-action model can often provide a good fit in this regime with appropriately re-fit  
378 parameters (see Fig. 1F). Introducing run lengths produces a larger effective diffusion coefficient and thus provides  
379 faster transport. As long as the single-particles have stochastic and identically distributed behavior, the ensemble  
380 will be well-described by a normal distribution by the central limit theorem. This only breaks down in the limit of  
381 very long unidirectional runs, as the system is no longer stochastic (Figure 1, Supplement 1).

### 382 Stochastic interpretation of the mass-action model

383 An important assumption of the mass-action model is that there are large numbers of transported particles, so that  
384 the behavior of the total system is deterministic. Intuitively, when each compartment contains many particles, then  
385 small fluctuations in particle number don't appreciably change concentration. Many types of dendritic cargo are  
386 present in high numbers (Cajigas et al., 2012).

387 When few cargo particles are present, fluctuations in particle number are more functionally significant. Although  
388 we did not model this regime directly, the mass-action model also provides insight into this stochastic regime.  
389 Instead of interpreting  $u_i$  as the amount of cargo in compartment  $i$ , this variable (when appropriately normalized)  
390 can be interpreted as the probability of a particle occupying compartment  $i$ . Thus, for a small number of transported  
391 cargoes, the mass-action model describes the average, or expected, distribution of the ensemble.

392 In this interpretation, the mass-action model models a spatial probability distribution. Let  $p_i$  denote the  
393 probability of a particle occupying compartment  $i$ . If a single particle starts in the somatic compartment at  $t = 0$ , and  
394 we query this particle's position after a long period of transport, then the probability ratio between of finding this  
395 particle in any parent-child pair of compartments converges to:

$$\left. \frac{p_p}{p_c} \right|_{ss} = \frac{b}{a}$$

396 which is analogous to equation (3) in the *Results*.

397 In the stochastic model, the number of molecules in each compartment converges to a binomial distribution at  
398 steady-state; the coefficient of variation in each compartment is given by:

$$\sqrt{\frac{1 - p_i^{(ss)}}{n p_i^{(ss)}}}$$

399 This suggests two ways of decreasing noise. First, increasing the total number of transported molecules,  $n$ , decreases  
400 the noise by a factor of  $1/\sqrt{n}$ . Second, increasing  $p_i$  decreases the noise in compartment  $i$ . However, this second  
401 option necessarily comes at the cost of decreasing occupation probability and thus increasing noise in other  
402 compartments.

## 403 Estimating parameters of the mass-action model using experimental data

404 The parameters of the mass-action model we study can be experimentally fit by estimating the drift and diffusion  
405 coefficients of particles over the length of a neurite. A common approach is to plot the mean displacement and mean  
406 squared displacement of particles as a function of time. The slopes of the best-fit lines in these cases respectively  
407 estimate the drift and diffusion coefficients in (11). Diffusion might not accurately model particle movements  
408 over short time scales because unidirectional cargo runs result in superdiffusive motion, evidenced by superlinear  
409 increases in mean squared-displacement with time (Caspi et al., 2000). However, over longer timescales, cargoes  
410 that stochastically change direction can be modeled as a diffusive process (Soundararajan and Bullock, 2014).

411 The mass-action model might also be fit by tracking the positions of a population of particles with photoacti-  
412 vatable GFP (Roy et al., 2012). In this case, the distribution of fluorescence at each point in time could be fit by  
413 a Gaussian distribution; the drift and diffusion coefficients are respectively proportional to the rate at which the  
414 estimated mean and variance evolves over time.

415 These experimental measurements can vary substantially across neuron types, experimental conditions, and  
416 cargo identities. Therefore, in order to understand fundamental features and constraints of the sushi belt model across  
417 systems, it is more useful to explore relationships within the model across ranges of parameters. Unless otherwise  
418 stated, the trafficking kinetics were constrained so that  $a_i + b_i = 1$  for each pair of connected compartments. This  
419 is equivalent to having a constant diffusion coefficient of one across all compartments. Given a target expression  
420 pattern along the microtubules, this is the only free parameter of the trafficking simulations; increasing the diffusion  
421 coefficient will always shorten convergence times, but not qualitatively change our results. In figure 6 we fixed the  
422 diffusion coefficients as specified in the *Results* based on optimistic estimates (Caspi et al., 2000; Soundararajan and  
423 Bullock, 2014).

## 424 Steady-state analysis

425 The steady-state ratio of trafficked cargo in neighboring compartments equals the ratio of the trafficking rate constants  
426 (equation 2). Consider a unbranched neurite with non-uniform anterograde and retrograde rate constants (equation  
427 1). It is easy to verify the steady-state relationship in the first two compartments, by setting  $\dot{u}_1 = 0$  and solving:

$$-a_1 u_1 + b_1 u_2 = 0 \Rightarrow \left. \frac{u_1}{u_2} \right|_{ss} = \frac{b_1}{a_1}$$

428 Successively applying the same logic down the cable confirms the condition in equation 2 holds globally. The more  
429 general condition for branched morphologies can be proven by a similar procedure (starting at the tips and moving  
430 in).

431 It is helpful to re-express the mass-action trafficking model as a matrix differential equation,  $\dot{\mathbf{u}} = A\mathbf{u}$ , where  
432  $\mathbf{u} = [u_1, u_2, \dots, u_N]^T$  is the state vector, and  $A$  is the state-transition matrix. For a general branched morphology,  $A$  will  
433 be nearly tridiagonal, with off-diagonal elements corresponding to branch points; matrices in this form are called

434 Hines matrices (Hines, 1984). For the simpler case of an unbranched cable,  $A$  is tridiagonal:

$$A = \begin{bmatrix} -a_1 & b_1 & 0 & \dots & 0 \\ a_1 & -b_1 - a_2 & b_2 & 0 & \\ 0 & a_2 & -b_2 - a_3 & b_3 & \ddots & \vdots \\ \vdots & 0 & a_3 & \ddots & & 0 \\ & & \ddots & & -b_{N-2} - a_{N-1} & b_{N-1} \\ 0 & \dots & 0 & a_{N-1} & -b_{N-1} \end{bmatrix}$$

435 For both branched and unbranched morphologies, each column of  $A$  sums to zero, which reflects conservation of  
 436 mass within the system. Assuming nonzero trafficking rates, the rank of  $A$  is exactly  $N - 1$  (this can be seen by taking  
 437 the sum of the first  $N - 1$  rows, which results in  $-1$  times the final row). Thus, the nullspace of  $A$  is one-dimensional.  
 438 Equation (3) describes this manifold of solutions: the level of cargo can be scaled by a common multiplier across all  
 439 compartments without disrupting the relation in (2).

440 The steady-state distribution,  $\tilde{\mathbf{u}}$ , is a vector that spans the nullspace of  $A$ . It is simple to show that all other  
 441 eigenvalues  $A$  are negative using the Gershgorin circle theorem; thus, the fixed point described by equation 2 is  
 442 stable. The convergence rate is determined by the non-zero eigenvalue with smallest magnitude of  $A$ . There are no  
 443 other fixed points or limit cycles in this system.

#### 444 **Biologically plausible model of a local demand signal**

445 There are many biochemical mechanisms that could signal demand. Here we briefly explore cytosolic calcium,  $[Ca]_i$ ,  
 446 as a candidate mechanism since it is modulated by local synaptic activity and  $[Ca]_i$  transients simultaneously arrest  
 447 anterograde and retrograde microtubular transport for certain cargoes (Wang and Schwarz, 2009). We represent the  
 448 effect of the calcium-dependent pathway by some function of calcium,  $f([Ca]_i)$ . This function could, for example,  
 449 capture the binding affinity of  $[Ca]_i$  to enzymes that alter the kinetics of motor proteins; the Hill equation would  
 450 provide a simple functional form. If all outgoing trafficking rates of a compartment are controlled by cytosolic  
 451 calcium — i.e. for any parent-child pair of compartments we have  $a = f([Ca]_p)$  and  $b = f([Ca]_c)$  — then condition  
 452 in equation 4 is satisfied:

$$\frac{b}{a} = \frac{f([Ca]_c)}{f([Ca]_p)} = \frac{\tilde{u}_p}{\tilde{u}_c} \quad (12)$$

453 where  $\tilde{u}_i = 1/f([Ca]_i)$ . We emphasize that other potential signaling pathways could achieve the same effect, so  
 454 while there is direct evidence for  $[Ca]_i$  as an important signal, the model can be interpreted broadly, with  $[Ca]_i$   
 455 serving as a placeholder for any local signal identified experimentally. Further,  $[Ca]_i$  itself may only serve as a  
 456 demand signal over short timescales, while other, more permanent, signals such as microtubule-associated proteins  
 457 (Soundararajan and Bullock, 2014) are needed to signal demand over longer timescales.

#### 458 **Simulations in realistic morphologies**

459 We obtained a CA1 pyramidal cell model Migliore and Migliore (2012) from the online repository ModelDB  
 460 (<https://senselab.med.yale.edu/modeldb/>), accession number 144541. We used the same spatial compartments used  
 461 by Migliore and Migliore (2012) and set the trafficking and dissociation parameters of the mass-action transport  
 462 model without reference to the geometry of the compartments. The mass-action model was simulated in Python

463 by solving matrix exponentials of  $A$  with the `scipy` library (Jones et al., 2001). In figure 2 we simulated electrical  
 464 activity of this model with excitatory synaptic input for 5 seconds using the Python API to NEURON (Hines et al.,  
 465 2009). We used the average membrane potential over this period to set the target demand level. In Figures 3 and 4,  
 466 we imposed artificial demand profiles with regions of low-demand and high-demand (10x larger) as depicted in the  
 467 figures.

468 In figure 8, we obtained representative morphologies of five cell types from `neuromorpho.org` (Ascoli et al., 2007).  
 469 Specifically, we downloaded a Purkinje cell (`Purkinje-slice-ageP43-6`), a parvalbumin-positive interneuron  
 470 (`AWa80213`), a Martinotti cell (`C100501A3`), a layer-5 pyramidal cell (`32-L5pyr-28`), and a granule cell from  
 471 the dentate gyrus (`041015-vehicle1`). In these simulations, we scaled the trafficking parameters inversely  
 472 proportional to the squared distance between the midpoints of the compartments. Doing this fixes the diffusion  
 473 coefficient of cargo trafficking as a constant,  $\text{Speci } \Delta$  For simulations with reattachment, we set the detachment  
 474 rate ( $c_i$ ) was set equal to trafficking rates ( $a_i, b_i$ ) for a 1 micron compartment. The detachment rate was increased  
 475 linearly in proportion to compartment length in order to model a spatially uniform capture process. We used a  
 476 custom-written Python library to generate movies and figures for these simulations (Williams, 2016).

## 477 Incorporating detachment and reattachment into the mass-action model

478 Introducing detachment into the mass-action model. For compartment  $i$  in a cable, the differential equations become:

$$\begin{aligned}\dot{u}_i &= a_{i-1}u_{i-1} - (a_i + b_{i-1} + c_i)u_i + b_i u_{i+1} \\ \dot{u}_i^* &= c_i u_i\end{aligned}$$

479 When  $a_i, b_i \gg c_i$ , then the distribution of cargo on the microtubules ( $u_i$ ) approaches a quasi-steady-state that  
 480 follows equation 3. In figure 4, we present DDT and DDD models as two strategies that distribute cargo to match a  
 481 demand signal  $\tilde{u}_i^*$ . As mentioned in the main text, a spectrum of models that interpolate between these extremes are  
 482 possible. To interpolate between these strategies, let  $F$  be a scalar between 0 and 1, and let  $\tilde{u}^*$  be normalized to sum  
 483 to one. We choose  $a_i$  and  $b_i$  to achieve:

$$\tilde{u}_i = F \tilde{u}_i^* + (1 - F)/N$$

484 along the microtubular network and choose  $c_i$  to satisfy

$$c_i \propto \frac{\tilde{u}_i^*}{F \tilde{u}_i^* + (1 - F)/N}$$

485 . Here,  $N$  is the number of compartments in the model. Setting  $F = 1$  results in the DDT model (demand is satisfied  
 486 purely by demand-modulated trafficking, and non-specific detachment, Fig. 4C). Setting  $F = 0$  results in the DDD  
 487 model (demand is satisfied purely by demand-modulated detachment, and uniform/non-specific trafficking, Fig. 4D).  
 488 An interpolated strategy is shown in figure 4E ( $F = 0.3$ ).

489 The mass-action model with reattachment (equation 6) produces the following system of differential equations  
 490 for a linear cable, with  $d_i$  denoting the rate constant of reattachment in compartment  $i$

$$\begin{aligned}\dot{u}_i &= a_{i-1}u_{i-1} - (a_i + b_{i-1} + c_i)u_i + b_i u_{i+1} + d_i u_i^* \\ \dot{u}_i^* &= c_i u_i - d_i u_i^*\end{aligned}$$

491 We examined the DDD model with  $N = 100$  compartments and diffusion coefficient of  $10\mu\text{m}^2 \text{s}^{-1}$ . The maximal  
492 detachment rate constant and the reattachment rates were tunable parameters, while the reattachment rates were  
493 spatially uniform. Results were similar when reattachment was modulated according to demand (data not shown,  
494 see supplemental simulations at <https://github.com/ahwillia/Williams-et-al-Synaptic-Transport>).

### 495 **Globally tuning transport rates to circumvent the speed-specificity tradeoff**

496 In figure 5, supplement 1, we explored whether fine-tuning the trafficking rates could provide both fast and precise  
497 cargo distribution. We investigated the DDD model with fast detachment rates in an unbranched cable with equally  
498 spaced synapses and  $N = 100$  compartments. Large detachment rates produced a proximal bias in cargo delivery  
499 which we empirically found could be corrected by setting the anterograde and retrograde trafficking rates to be:

$$a_i = \frac{D}{2} + \beta \cdot \frac{N-1-i}{N-2}$$

500

$$b_i = \frac{D}{2} - \beta \cdot \frac{N-1-i}{N-2}$$

501 where  $i = \{1, 2, \dots, N-1\}$  indexes the trafficking rates from the soma ( $i = 1$ ) to the other end of the cable ( $i = N-1$ ),  
502 and  $D = 10\mu\text{m}^2/\text{s}$  is the diffusion coefficient. Faster detachment rates require larger values for the parameter  $\beta$ ; note  
503 that  $\beta < D/2$  is a constraint to prevent  $b_i$  from becoming negative. This heuristic qualitatively improved, but did not  
504 precisely correct for, fast detachment rates in the DDT model (data not shown).

505 Intuitively, the profile of the proximal delivery bias is roughly exponential (Fig. 6B), and therefore the anterograde  
506 rates need to be tuned more aggressively near the soma (where the bias is most pronounced), and more gently tuned  
507 as the distance to the soma increases. Importantly, tuning the trafficking rates in this manner does not alter the  
508 diffusion coefficient (proportional to  $a_i + b_i$ ) constant along the length of the cable. Instead, by increasing  $a_i$  and  
509 decreasing  $b_i$  we introduce a rightward drift/velocity in the cargo distribution.

### 510 **ACKNOWLEDGEMENTS**

511 We thank Eve Marder, Subhaneil Lahiri, Friedemann Zenke, and Benjamin Regner for useful feedback on the  
512 manuscript, and thank Simon Bullock for useful discussion. This research was supported by the Department of  
513 Energy Computational Science Graduate Fellowship, NIH Grant 1P01NS079419, NIH Grant P41GM103712, the  
514 Howard Hughes Medical Institute, and the Charles A. King Trust.

### 515 **COMPETING INTERESTS**

516 The authors declare that there are no competing interests.

### 517 **REFERENCES**

- 518 Aakalu, G., Smith, W. B., Nguyen, N., Jiang, C., and Schuman, E. M. (2001). Dynamic visualization of local protein  
519 synthesis in hippocampal neurons. *Neuron*, 30(2):489–502.
- 520 Ascoli, G. A., Donohue, D. E., and Halavi, M. (2007). Neuromorpho. org: a central resource for neuronal  
521 morphologies. *J. Neurosci.*, 27(35):9247–9251.
- 522 Bading, H. (2000). Transcription-dependent neuronal plasticity. *Eur. J. Biochem.*, 267(17):5280–5283.

- 523 Bhalla, U. S. (2011). Trafficking Motifs as the Basis for Two-Compartment Signaling Systems to Form Multiple  
524 Stable States. *Biophys. J.*, 101(1):21–32.
- 525 Bhalla, U. S. (2014). Molecular computation in neurons: a modeling perspective. *Curr. Opin. Neurobiol.*, 25:31–37.
- 526 Block, S. M., Goldstein, L. S. B., and Schnapp, B. J. (1990). Bead movement by single kinesin molecules studied  
527 with optical tweezers. *Nature*, 348(6299):348–352.
- 528 Bloodgood, B. L., Sharma, N., Browne, H. A., Trepman, A. Z., and Greenberg, M. E. (2013). The activity-dependent  
529 transcription factor npas4 regulates domain-specific inhibition. *Nature*, 503(7474):121–125.
- 530 Bressloff, P. and Earnshaw, B. (2007). Diffusion-trapping model of receptor trafficking in dendrites. *Phys. Rev. E*,  
531 75(4):041915.
- 532 Bressloff, P. and Newby, J. (2009). Directed intermittent search for hidden targets. *New J. Phys.*, 11(2):023033.
- 533 Bressloff, P. C. (2006). Stochastic model of protein receptor trafficking prior to synaptogenesis. *Phys. Rev. E Stat.*  
534 *Nonlin. Soft. Matter. Phys.*, 74(3).
- 535 Bressloff, P. C. and Newby, J. M. (2013). Stochastic models of intracellular transport. *Rev. Mod. Phys.*, 85(1):135–  
536 196.
- 537 Buxbaum, A. R., Haimovich, G., and Singer, R. H. (2014a). In the right place at the right time: visualizing and  
538 understanding mRNA localization. *Nat. Rev. Mol. Cell Biol.*, 16(2):95–109.
- 539 Buxbaum, A. R., Wu, B., and Singer, R. H. (2014b). Single-Actin mRNA Detection in Neurons Reveals a Mechanism  
540 for Regulating Its Translatability. *Science*, 343(6169):419–422.
- 541 Buxbaum, A. R., Yoon, Y. J., Singer, R. H., and Park, H. Y. (2015). Single-molecule insights into mRNA dynamics  
542 in neurons. *Trends Cell Biol.*, 25(8):468–475.
- 543 Cajigas, I. J., Tushev, G., Will, T. J., tom Dieck, S., Fuerst, N., and Schuman, E. M. (2012). The local transcriptome  
544 in the synaptic neuropil revealed by deep sequencing and high-resolution imaging. *Neuron*, 74(3):453–466.
- 545 Caspi, A., Granek, R., and Elbaum, M. (2000). Enhanced diffusion in active intracellular transport. *Phys. Rev. Lett.*,  
546 85:5655–5658.
- 547 Ch’ng, T. and Martin, K. (2011). Synapse-to-nucleus signaling. *Curr. Opin. Neurobiol.*, 21:345–52.
- 548 Deisseroth, K., Mermelstein, P. G., Xia, H., and Tsien, R. W. (2003). Signaling from synapse to nucleus: the logic  
549 behind the mechanisms. *Curr. Opin. Neurobiol.*, 13(3):354–365.
- 550 Doyle, M. and Kiebler, M. A. (2011). Mechanisms of dendritic mRNA transport and its role in synaptic tagging.  
551 *EMBO J.*, 30(17):3540–3552.
- 552 Dyne, J. L. and Steward, O. (2007). Dynamics of bidirectional transport of *Arc* mRNA in neuronal dendrites. *J.*  
553 *Comp. Neurol.*, 500(3):433–447.
- 554 Farris, S., Lewandowski, G., Cox, C. D., and Steward, O. (2014). Selective Localization of *Arc* mRNA in Dendrites  
555 Involves Activity- and Translation-Dependent mRNA Degradation. *J. Neurosci.*, 34(13):4481–4493.
- 556 Fedotov, S. and Méndez, V. (2008). Non-markovian model for transport and reactions of particles in spiny dendrites.  
557 *Phys. Rev. Lett.*, 101(21):218102.
- 558 Flavell, S. W. and Greenberg, M. E. (2008). Signaling mechanisms linking neuronal activity to gene expression and  
559 plasticity of the nervous system. *Annual review of neuroscience*, 31:563.
- 560 Frey, U. and Morris, R. (1998). Weak before strong: dissociating synaptic tagging and plasticity-factor accounts of  
561 late-LTP. *Neuropharmacol.*, 37(4-5):545–552.
- 562 Frey, U. and Morris, R. G. M. (1997). Synaptic tagging and long-term potentiation. *Nature*, 385(6616):533–536.

- 563 Gagnon, J. and Mowry, K. (2011). Molecular motors: directing traffic during RNA localization. *Crit Rev Biochem*  
564 *Mol Biol*, 46:229–39.
- 565 Gardiner, C. (2009). *Stochastic Methods: A Handbook for the Natural and Social Sciences (Springer Series in*  
566 *Synergetics)*. Springer, 4 edition.
- 567 Grant, B. D. and Donaldson, J. G. (2009). Pathways and mechanisms of endocytic recycling. *Nat. Rev. Mol. Cell*  
568 *Biol.*, 10(9):597–608.
- 569 Greer, P. L. and Greenberg, M. E. (2008). From synapse to nucleus: Calcium-dependent gene transcription in the  
570 control of synapse development and function. *Neuron*, 59(6):846 – 860.
- 571 Han, E. B. and Heinemann, S. F. (2013). Distal Dendritic Inputs Control Neuronal Activity by Heterosynaptic  
572 Potentiation of Proximal Inputs. *J. Neurosci.*, 33(4):1314–1325.
- 573 Hancock, W. O. (2014). Bidirectional cargo transport: moving beyond tug of war. *Nat. Rev. Mol. Cell Biol.*,  
574 15(9):615–628.
- 575 Hines, M. (1984). Efficient computation of branched nerve equations. *Int. J. Biomed. Comput.*, 15(1):69–76.
- 576 Hines, M. L., Davison, A. P., and Muller, E. (2009). Neuron and python. *Front. Neuroinform.*, 3.
- 577 Hirokawa, N., Niwa, S., and Tanaka, Y. (2010). Molecular Motors in Neurons: Transport Mechanisms and Roles in  
578 Brain Function Development, and Disease. *Neuron*, 68(4):610–638.
- 579 Hoffman, D., Magee, J., Colbert, C., and Johnston, D. (1997).  $K^+$  channel regulation of signal propagation in  
580 dendrites of hippocampal pyramidal neurons. *Nature*, 387:869–75.
- 581 Holt, C. E. and Schuman, E. M. (2013). The central dogma decentralized: New perspectives on RNA function and  
582 local translation in neurons. *Neuron*, 80(3):648–657.
- 583 Jones, E., Oliphant, T., Peterson, P., et al. (2001). SciPy: Open source scientific tools for Python.
- 584 Kandel, E. R. (2001). The Molecular Biology of Memory Storage: A Dialogue Between Genes and Synapses.  
585 *Science*, 294(5544):1030–1038.
- 586 Kang, H. and Schuman, E. M. (1996). A requirement for local protein synthesis in neurotrophin-induced hippocampal  
587 synaptic plasticity. *Science*, 273(5280):1402–1406.
- 588 Kao, D.-I., Aldridge, G. M., Weiler, I. J., and Greenough, W. T. (2010). Altered mRNA transport, docking,  
589 and protein translation in neurons lacking fragile x mental retardation protein. *Proc. Natl. Acad. Sci. USA*,  
590 107(35):15601–15606.
- 591 Keener, J. P. and Sneyd, J. (1998). *Mathematical Physiology*. Springer, New York.
- 592 Kim, S. and Martin, K. C. (2015). Neuron-wide RNA transport combines with netrin-mediated local translation to  
593 spatially regulate the synaptic proteome. *eLife*, 4:e04158.
- 594 Klumpp, S. and Lipowsky, R. (2005). Cooperative cargo transport by several molecular motors. *Proc. Natl. Acad.*  
595 *Sci. U.S.A.*, 102(48):17284–17289.
- 596 Lyles, V., Zhao, Y., and Martin, K. C. (2006). Synapse Formation and mRNA Localization in Cultured Aplysia  
597 Neurons. *Neuron*, 49(3):349–356.
- 598 Magee, J. (1998). Dendritic hyperpolarization-activated currents modify the integrative properties of hippocampal  
599 CA1 pyramidal neurons. *J Neurosci*, 18:7613–24.
- 600 Migliore, M. and Migliore, R. (2012). Know your current  $I_h$ : Interaction with a shunting current explains the  
601 puzzling effects of its pharmacological or pathological modulations. *PLoS ONE*, 7(5):e36867.
- 602 Mironov, S. L. (2007). ADP Regulates Movements of Mitochondria in Neurons. *Biophys. J.*, 92(8):2944–2952.

- 603 Moga, D., Calhoun, M., Chowdhury, A., Worley, P., Morrison, J., and Shapiro, M. (2004). Activity-regulated  
604 cytoskeletal-associated protein is localized to recently activated excitatory synapses. *Neurosci.*, 125(1):7–11.
- 605 Müller, M. J. I., Klumpp, S., and Lipowsky, R. (2008). Tug-of-war as a cooperative mechanism for bidirectional  
606 cargo transport by molecular motors. *Proc. Natl. Acad. Sci. U.S.A.*, 105(12):4609–4614.
- 607 Newby, J. and Bressloff, P. C. (2010a). Local synaptic signaling enhances the stochastic transport of motor-driven  
608 cargo in neurons. *Phys. Biol.*, 7(3):036004.
- 609 Newby, J. M. and Bressloff, P. C. (2010b). Quasi-steady state reduction of molecular motor-based models of directed  
610 intermittent search. *B. Math. Biol.*, 72(7):1840–1866.
- 611 Nguyen, P. V., Abel, T., and Kandel, E. R. (1994). Requirement of a critical period of transcription for induction of a  
612 late phase of LTP. *Science*, 265(5175):1104–1107.
- 613 Okuno, H., Akashi, K., Ishii, Y., Yagishita-Kyo, N., Suzuki, K., Nonaka, M., Kawashima, T., Fujii, H., Takemoto-  
614 Kimura, S., Abe, M., Natsume, R., Chowdhury, S., Sakimura, K., Worley, P. F., and Bito, H. (2012). Inverse  
615 Synaptic Tagging of Inactive Synapses via Dynamic Interaction of Arc/Arg3.1 with CaMKII $\beta$ . *Cell*, 149(4):886 –  
616 898.
- 617 Park, M., Penick, E. C., Edwards, J. G., Kauer, J. A., and Ehlers, M. D. (2004). Recycling endosomes supply AMPA  
618 receptors for LTP. *Science*, 305(5692):1972–1975.
- 619 Park, M., Salgado, J. M., Ostroff, L., Helton, T. D., Robinson, C. G., Harris, K. M., and Ehlers, M. D. (2006).  
620 Plasticity-induced growth of dendritic spines by exocytic trafficking from recycling endosomes. *Neuron*, 52(5):817–  
621 830.
- 622 Redondo, R. L. and Morris, R. G. (2011). Making memories last: the synaptic tagging and capture hypothesis. *Nat.*  
623 *Rev. Neurosci.*, 12(1):17–30.
- 624 Rogers, S. L. and Gelfand, V. I. (1998). Myosin cooperates with microtubule motors during organelle transport in  
625 melanophores. *Curr. Biol.*, 8(3):161–164.
- 626 Roy, S., Yang, G., Tang, Y., and Scott, D. A. (2012). A simple photoactivation and image analysis module for  
627 visualizing and analyzing axonal transport with high temporal resolution. *Nat. Protoc.*, 7(1):62–68.
- 628 Smith, D. and Simmons, R. (2001). Models of Motor-Assisted Transport of Intracellular Particles. *Biophys. J.*,  
629 80(1):45–68.
- 630 Soundararajan, H. C. and Bullock, S. L. (2014). The influence of dynein processivity control, maps, and microtubule  
631 ends on directional movement of a localising mRNA. *eLife*, 3:e01596.
- 632 Spiegel, I., Mardinly, A. R., Gabel, H. W., Bazinet, J. E., Couch, C. H., Tzeng, C. P., Harmin, D. A., and Greenberg,  
633 M. E. (2014). Npas4 regulates excitatory-inhibitory balance within neural circuits through cell-type-specific gene  
634 programs. *Cell*, 157(5):1216 – 1229.
- 635 Steward, O., Farris, S., Pirbhoy, P. S., Darnell, J., and Driesche, S. J. V. (2015). Localization and local translation of  
636 *Arc/Arg3.1* mRNA at synapses: some observations and paradoxes. *Front. Mol. Neurosci.*, 7.
- 637 Steward, O., Wallace, C., Lyford, G., and Worley, P. (1998). Synaptic Activation Causes the mRNA for the IEG *Arc*  
638 to Localize Selectively near Activated Postsynaptic Sites on Dendrites. *Neuron*, 21(4):741–751.
- 639 Steward, O. and Worley, P. F. (2001). Selective Targeting of Newly Synthesized *Arc* mRNA to Active Synapses  
640 Requires NMDA Receptor Activation. *Neuron*, 30(1):227–240.
- 641 Sutton, M. A. and Schuman, E. M. (2006). Dendritic protein synthesis, synaptic plasticity, and memory. *Cell*,  
642 127(1):49–58



- 643 Vickers, C. A., Dickson, K. S., and Wyllie, D. J. A. (2005). Induction and maintenance of late-phase long-term  
644 potentiation in isolated dendrites of rat hippocampal CA1 pyramidal neurones. *J. Physiol.*, 568(3):803–813.
- 645 Voit, E. O., Martens, H. A., and Omholt, S. W. (2015). 150 years of the mass action law. *PLoS Comput. Biol.*,  
646 11(1):1–7.
- 647 Wang, X. and Schwarz, T. L. (2009). The Mechanism of  $Ca^{2+}$ -Dependent Regulation of Kinesin-Mediated  
648 Mitochondrial Motility. *Cell*, 136(1):163–174.
- 649 Welte, M. A. (2004). Bidirectional transport along microtubules. *Curr. Biol.*, 14(13):R525–R537.
- 650 Williams, A. H. (2016). PyNeuron Toolbox. <https://github.com/ahwillia/PyNeuron-Toolbox>.
- 651 Wu, B., Eliscovich, C., Yoon, Y. J., and Singer, R. H. (2016). Translation dynamics of single mRNAs in live cells  
652 and neurons. *Science*, 352(6292):1430–1435.
- 653 Zheng, N., Jeyifous, O., Munro, C., Montgomery, J. M., and Green, W. N. (2015). Synaptic activity regulates AMPA  
654 receptor trafficking through different recycling pathways. *eLife*, 4.

655 FIGURE SUPPLEMENTS

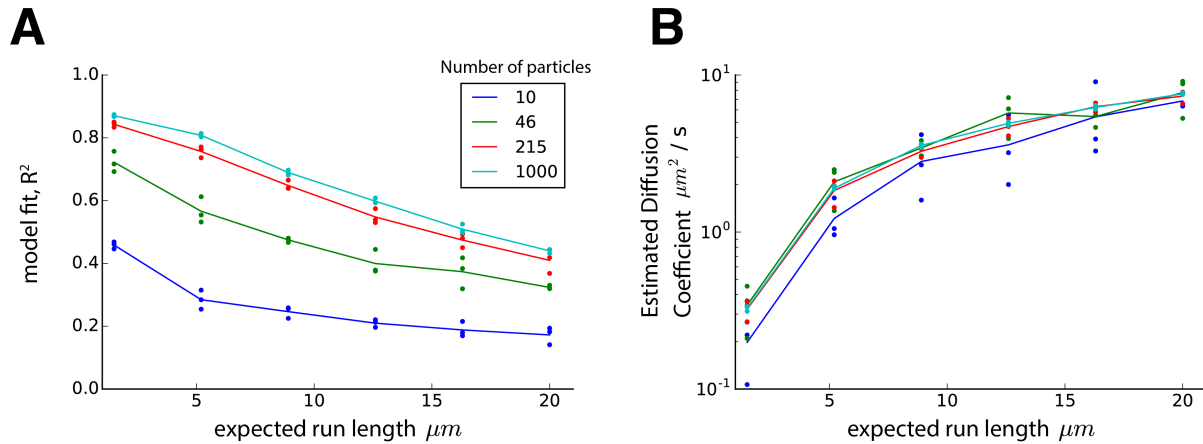

**Figure 1 supplement 1.** The effect of cargo run length on mass-action model fit and diffusion coefficient. The model of stochastic particle movement (Equation 7, *Methods*) was simulated with equal transition probabilities ( $p_- = p_0 = p_+ = 1/3$ ) for various values of  $k$  and particle numbers in an infinite cable with  $1 \mu\text{m}$  compartments and 1 second time steps. The expected run length is given by the mean of a negative binomial distribution. For each simulation, a mass-action approximation was fit by matching the first two moments of the cargo distribution, as described in the *Methods*. In both panels, dots represent simulated triplicates, and lines denote the average outcome with colors denoting the simulated ensemble size (see legend). **(A)** The mass-action model (Equation 1, *Results*) provides a reasonably accurate fit after 100 seconds of simulation with moderately long run lengths and low particle numbers. The fit improves for longer simulations and larger particle numbers, since the cargo distribution is better approximated by a normal distribution under these conditions due to the central limit theorem. The coefficient of determination,  $R^2$ , reflects the proportion of explained variance by the mass-action model (equivalent to a Gaussian fit to the concentration profile). **(B)** The estimated diffusion coefficient of the mass-action model (i.e. the variance of the Gaussian fit in panel A) increases as expected run length increases.

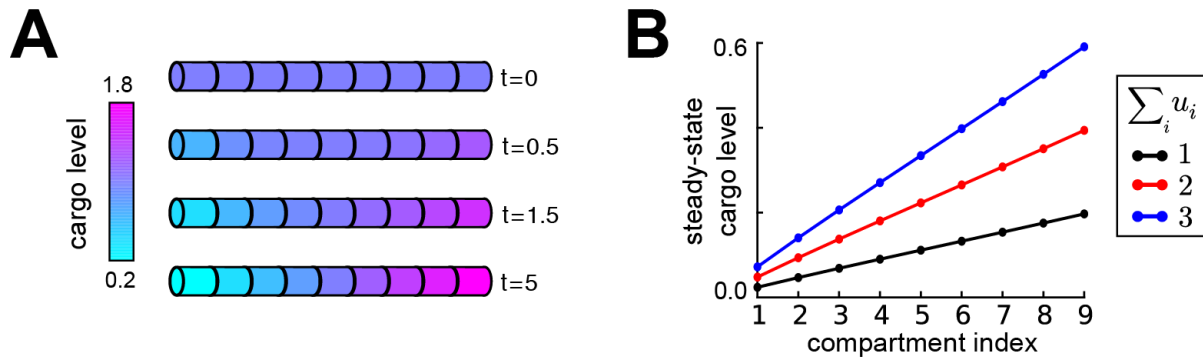

**Figure 2 supplement 1.** Equation 4 specifies the relative distribution of cargo, changing the total amount of cargo scales this distribution. **(A)** Inspired by ion channel expression gradients observed in hippocampal cells (Hoffman et al., 1997; Magee, 1998), we produced a linear gradient in cargo distribution in an unbranched cable. By equation 4, the trafficking rate constants satisfy  $b_i/a_i = i/i + 1$  (where  $i$  indexes on increasing distance to the soma). Starting from a uniform distribution of cargo in the cable ( $t = 0$  a.u.), the desired linear profile emerges over time. **(B)** Changing the amount of cargo in the cable (the sum of  $u_i$  across all compartments, see legend) does not disrupt the steady-state linear expression profile, but scales its slope.

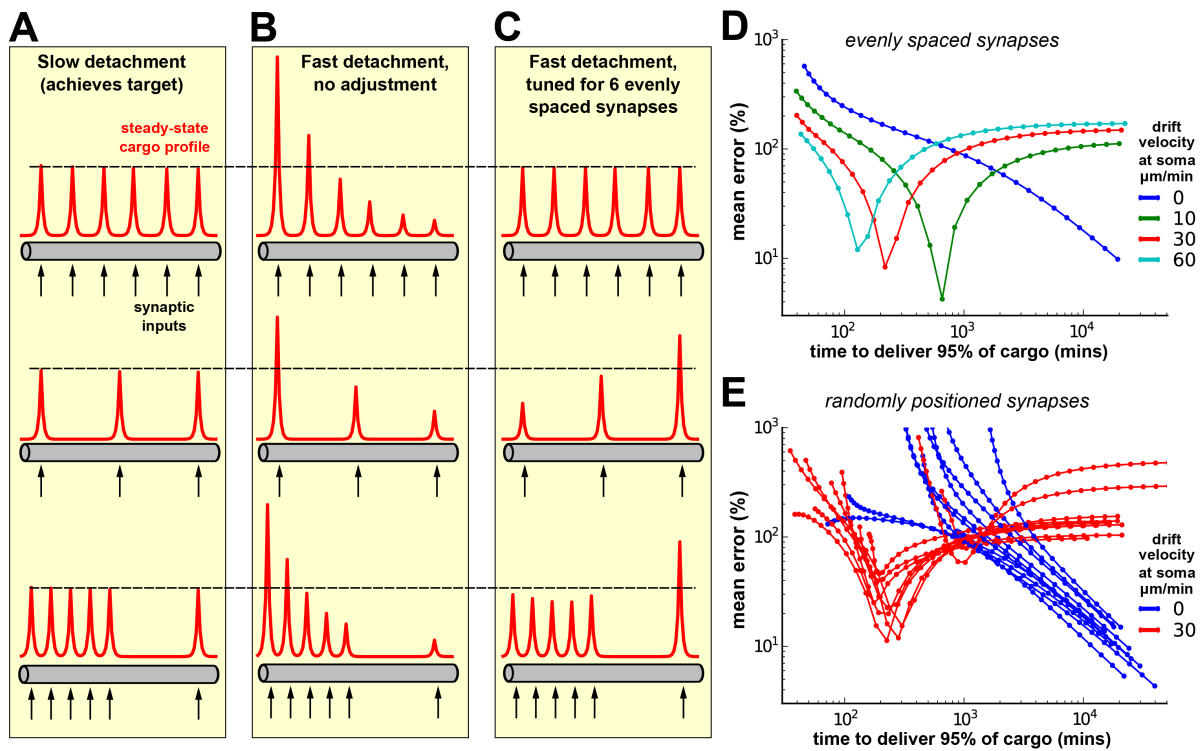

**Figure 5 supplement 1.** Tuning the model for speed and specificity results in sensitivity to the target spatial distribution of cargo. **(A-C)** Cargo begins on the left end of an unbranched cable, and is ideally distributed equally amongst a number recently stimulated synaptic sites (black arrows). We set the length of the cable to  $800 \mu\text{m}$  (roughly the length of an apical dendrite in a CA1 cell) and the diffusion coefficient to  $10 \mu\text{m}^2/\text{s}$  — an estimate on the upper end of what might be biologically achieved (see Fig. 1, Caspi et al., 2000; Soundararajan and Bullock, 2014). Steady-state cargo profiles (red) for three stimulation patterns (black arrows) along an unbranched cable. The dotted black line corresponds to the ‘target’ steady-state level at each delivery site. **(A)** When the timescale of detachment is sufficiently slow, cargo can be evenly distributed to the synapses regardless of their number and position. Transport parameters were set according to the procedure shown in figure 4D. **(B)** When detachment is naïvely increased (all rates multiplicatively scaled) a proximal bias in the steady-state distribution of cargo across all stimulation patterns. **(C)** Transport rate constants,  $a_i$  and  $b_i$ , were tuned to optimize the distribution of cargo to six equally spaced synapses (top row); detachment rate constants were the same as in panel B. Changing the number of synapses (middle row) or the position of the synapses (bottom row) causes the unequal distribution of cargo to synapses. **(D)** Tradeoff curves between non-specificity and convergence rate for six evenly spaced synapses (top row of A-C). Trafficking parameters were chosen so that the anterograde velocity decreased linearly over the length of the cable; the color of the lines shows the maximum velocity at the soma. The tradeoff curves shift to the left and becomes non-monotonic as the anterograde velocity increases. **(E)** Tradeoff curves for six randomly positioned synapses drawn uniformly across the cable. Ten simulations are shown for two levels of anterograde velocity (blue lines,  $0 \mu\text{m}/\text{min}$ ; red lines  $30 \mu\text{m}/\text{min}$ ); as before, the velocity linearly decreased across the length of the cable.

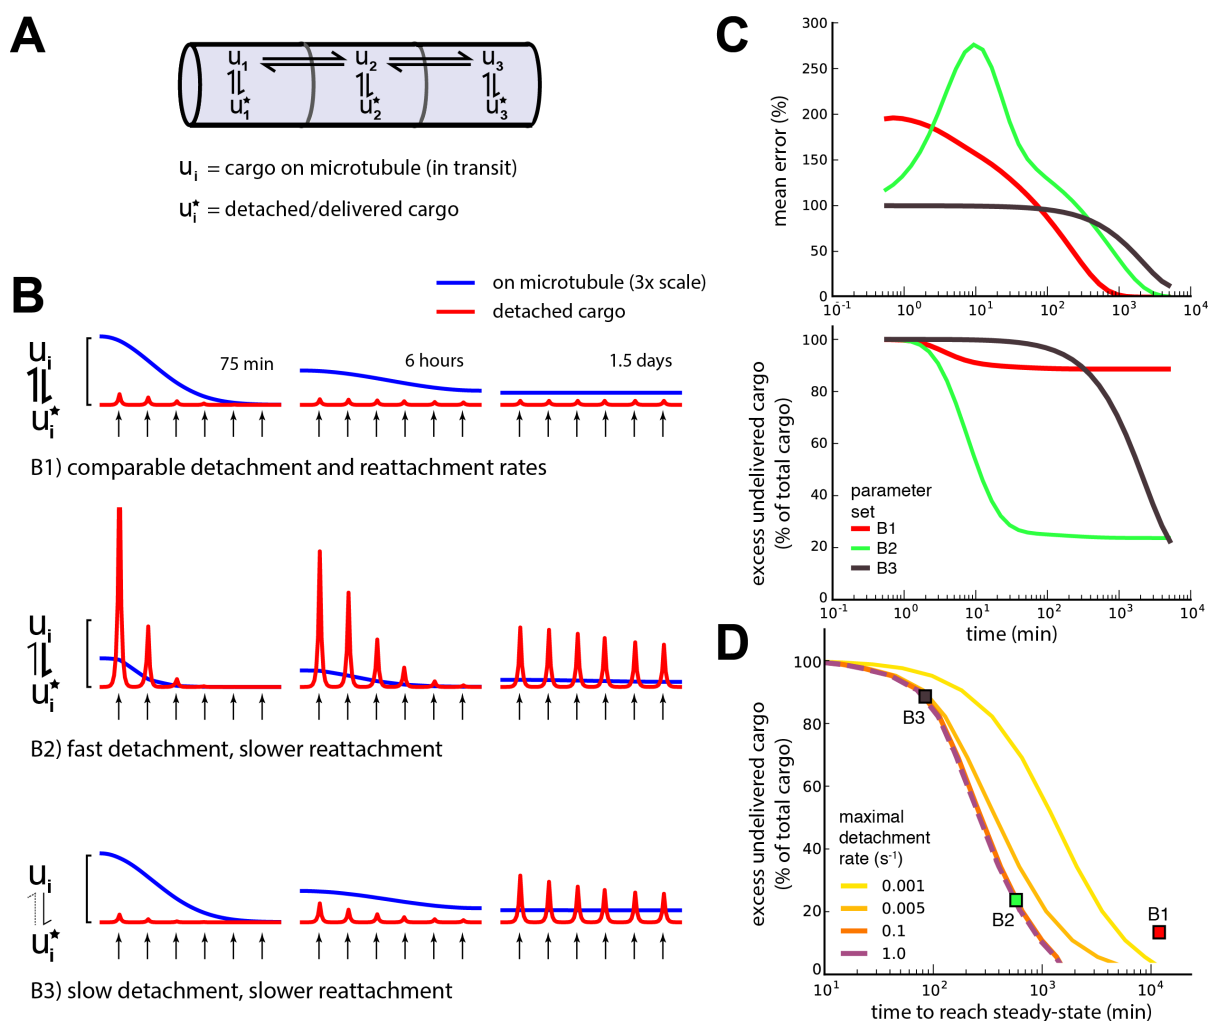

**Figure 5 supplement 2.** Adding a mechanism for cargo reattachment produces a further tradeoff between rate of delivery and excess cargo. **(A)** Schematic of mass-action model with reversible detachment of cargo. **(B)** Simulations of three illustrative parameter sets. As in figure 6, cargo is distributed to six demand hotspots (black arrows). Six evenly distributed demand hotspots are placed along a neurite with a biologically relevant length of  $800 \mu\text{m}$  and an optimistic diffusion coefficient of  $10 \mu\text{m}^2/\text{s}$ . The distributions of cargo on the microtubules ( $u_i$ , blue) and detached cargo ( $u_i^*$ , red) are shown at three time points for each model. Top row, a model in which detachment and reattachment occur on similar timescales (fast convergence). Middle row, a model in which detachment happens on a faster timescale than reattachment (reattachment is still quite fast relative to trafficking rates; slow convergence). Bottom row, a model in which detachment occurs slowly, and reattachment occurs even slower (slow convergence). **(C)** Mean percent error in the distribution of detached cargo (top) and excess cargo (bottom) as a function of time for the three parameter sets shown in panel B. **(D)** Tradeoff curves between excess cargo and time to converge to steady-state. Fast reattachment rates caused large excess cargo (upper left corner); increasing reattachment decreased this excess, but also increased the convergence time (lower right corner). The tradeoff is present across four detachment timescales (yellow-to-purple lines) that span four orders of magnitude. Colored squares denote the position of the three parameter sets shown in panels B and C. A model was judged to reach steady-state when the derivatives dropped below a set threshold, near zero (see *Methods*).
